# Supplementary material for: Comparing the Clinical Frailty Scale and an International Classification of Diseases-10 Modified Frailty Index in Predicting Long-Term Survival in Critically Ill Patients
Source: PubMed Central journal article supplement — Crit Care Explor. 2022 Oct 13;4(10):e0777. doi: 10.1097/CCE.0000000000000777 (PMC9575763; doi:10.1097/cce.0000000000000777), 2022-10-13
Supplement: cc9-4-e0777-s001.pdf [file cc9-4-e0777-s001.pdf]

## Supplementary Material

# Comparing the clinical frailty scale and an International Coding of Disease-10 modified frailty index in predicting long-term survival in critically ill patients

### Authors:

Ashwin Subramaniam<sup>1,2,3</sup> MBBS, MMed, FRACP, FCICM

Ryo Ueno<sup>3,4</sup>, MD

Ravindranath Tiruvoipati<sup>1,2,3</sup>, MBBS, MS, MCh, FRCSEd, MSc, FCICM, EDIC, PhD

Jai Darvall<sup>5,6</sup>, FANZCA, FCICM, PhD

Velandai Srikanth<sup>2,7,8</sup>, MBBS, FRACP, PhD

Michael Bailey<sup>3</sup> PhD, MSc(statistics), BSc(hons)

David Pilcher<sup>3,9,10</sup> MBBS MRCP(UK) FRACP FCICM

Rinaldo Bellomo<sup>3,5,6,11</sup> MBBS (Hons), MD, PhD, FRACP, FCICM

## Legends for Supplementary Tables and Figures

**Supplementary Table 1:** A complete list of ICD-10 variables extracted from the VAED database.

**Supplementary Table 2:** A complete list of ICD-10 variables extracted from the VDI database.

**Supplementary Table 3:** ICD-10 codes used to estimate the ICD-10mFI.

**Supplementary Table 4:** Comparison between included (n=7,001) vs excluded (n=13,457).

**Supplementary Table 5:** Reduction over time in the proportion of patients without a documented CFS in the ANZICS database.

**Supplementary Table 6:** Variations observed in the proportion of each of the 11 comorbidity measures of modified Frailty Index (mFI) between the CFS and the ICD-10mFI.

**Supplementary Table 7:** Unadjusted outcomes.

**Supplementary Table 8:** Logistic Regression analysis for short-term and long-term mortalities for all patients and those stratified based on age. Unadjusted and adjusted for ANZROD and sex. The odds ratio (OR) in bold represents statistically significant results. Graphically presented in Figure 2.

**Supplementary Table 9:** Association between the CFS and the ICD-10-mFI for all patients and subgroups stratified by age.

**Supplementary Table 10:** Cox Proportional Hazards Regression Analysis, for 6-month survival, adjusted for ANZROD and sex, for subgroups stratified by age.

**Supplementary Table 11:** Comparison of Clinical Frailty Scale (CFS) and ICD-10-modified Frailty Index (mFI) for predicting clinical outcomes, for subgroups stratified by age.

**Supplementary Table 12:** Demographic table describing the dichotomized comparison between frail and non-frail between the ICD-10mFI with and without the ICD-10 code for Hypertension (82.3).

**Supplementary Table 13:** Association between the Clinical Frailty Scale (CFS) and the ICD-10mFI including the ICD-10 code for Hypertension (82.3).

**Supplementary Table 14:** Cox Proportional Hazards Regression Analysis, for 6-month survival, adjusted for the male sex, and ANZROD with and without 82.3 ICD-10 code for Hypertension.

**Supplementary Table 15:** Comparison of ICD-10 modified Frailty Index (ICD-10mFI) with and without 82.3 ICD-10 code for Hypertension.

**Supplementary Table 16:** Differences between CFS vs. HFRS and CFS vs. ICD-10-mFI studies to demonstrate how this current paper enhances knowledge and provides insight on how the clinicians should do when it comes to estimating frailty using administrative data.

**Supplementary Figure 1:** Flow diagram describing the patients included in the study.

**Supplementary Figure 2:** Distributions of CFS and ICD-10mFI scores.

**Supplementary Figure 3:** Area under the receiver operator curve for short- and long-term mortalities. The CFS was significantly better than the ICD-10mFI. The right panels showed that neither provided any worthwhile improvement on top of ANZROD.

**Supplementary Figure 4:** Kaplan Meier curves between frail and non-frail patients for CFS, ICD-10mFI with and without ICD-10 82.3 for Hypertension included for all patients.

**Supplementary Figure 5:** Multivariable logistic regression, adjusted for ANZROD and sex, for short- and long-term mortality between CFS and ICD-10mFI treated as a continuous variable for those stratified based on age.

**Supplementary Figure 6:** Kaplan Meier curves between frail and non-frail patients (treated as a dichotomous variable) for CFS and ICD-10mFI for those stratified based on age.

**Supplementary Table 1:** A complete list of ICD-10 variables extracted from the VAED database.

| Data Field Description      | Definition                                                                                                                                                                                                                                                    |
|-----------------------------|---------------------------------------------------------------------------------------------------------------------------------------------------------------------------------------------------------------------------------------------------------------|
| Month and Year of Admission | Month and Year on which a patient commences an episode of care.                                                                                                                                                                                               |
| Care type                   | The nature of clinical service (type of care) provided to an admitted patient during an episode of care. There must be one and only one care type code per episode. A change in care type results in a statistical separation and a new episode with a status |
|                             | 1 NHT/Non-Acute                                                                                                                                                                                                                                               |
|                             | P Designated Pediatric Rehabilitation Program/Unit                                                                                                                                                                                                            |
|                             | 2 Designated Rehabilitation Program/Unit: Level 1                                                                                                                                                                                                             |
|                             | 6 Designated Rehabilitation Program/Unit: Level 2                                                                                                                                                                                                             |
|                             | 8 Palliative Care Program                                                                                                                                                                                                                                     |
|                             | 5 Mental Health                                                                                                                                                                                                                                               |
|                             | 9 Geriatric Evaluation and Management Program                                                                                                                                                                                                                 |
|                             | R1 Restorative Care: On-site                                                                                                                                                                                                                                  |
|                             | R2 Restorative Care: Off-site                                                                                                                                                                                                                                 |
|                             | 0 Alcohol and Drug Program                                                                                                                                                                                                                                    |
|                             | 4 Other care (Acute) including Qualified newborn                                                                                                                                                                                                              |
|                             | U Unqualified newborn                                                                                                                                                                                                                                         |
|                             | N Qualified Newborn                                                                                                                                                                                                                                           |
|                             | U Unqualified Newborn                                                                                                                                                                                                                                         |
| X Not Applicable            |                                                                                                                                                                                                                                                               |
| Admission type              | The type of admission relating to this episode of care:                                                                                                                                                                                                       |
|                             | K Posthumous Organ Procurement                                                                                                                                                                                                                                |
|                             | S Statistical admission (change in Care Type within this hospital)                                                                                                                                                                                            |
|                             | Y Birth episode                                                                                                                                                                                                                                               |
|                             | M Maternity                                                                                                                                                                                                                                                   |
|                             | C Emergency admission through Emergency Department at this hospital (VEMD reporting hospitals only)                                                                                                                                                           |
|                             | L Admission – from the Waiting List (ESIS reporting hospitals only)                                                                                                                                                                                           |
|                             | O Other emergency admissions                                                                                                                                                                                                                                  |
|                             | X Other admissions                                                                                                                                                                                                                                            |
| Admission type indicator    | Admission type indicator derived from Admission Type                                                                                                                                                                                                          |
|                             | E Emergency                                                                                                                                                                                                                                                   |
|                             | L Elective                                                                                                                                                                                                                                                    |
|                             | M Maternity                                                                                                                                                                                                                                                   |
|                             | N Newborn (<= 9 days old)                                                                                                                                                                                                                                     |
|                             | S Statistical                                                                                                                                                                                                                                                 |
| Criterion for Admission     | This field indicates the criterion for admission for the episode of care.                                                                                                                                                                                     |
|                             | K Posthumous Organ Procurement                                                                                                                                                                                                                                |
|                             | N Qualified newborn                                                                                                                                                                                                                                           |
|                             | U Unqualified newborn                                                                                                                                                                                                                                         |
|                             | R Restorative Care: Off-site                                                                                                                                                                                                                                  |
|                             | O Patient is expected to require hospitalization for a minimum of one night                                                                                                                                                                                   |
|                             | B Day-only Automatically Admitted Procedures                                                                                                                                                                                                                  |
|                             | E Day-only Extended Medical Treatment                                                                                                                                                                                                                         |

|                                         |                                                                                                                                                                                                |
|-----------------------------------------|------------------------------------------------------------------------------------------------------------------------------------------------------------------------------------------------|
|                                         | C Day-only Not Automatically Qualified Procedures                                                                                                                                              |
|                                         | S Secondary family member                                                                                                                                                                      |
| Admission/readmission to rehabilitation | For Care Types P, 2 and 6, this field indicates whether this is the first or subsequent rehabilitation episode for a particular injury/condition.                                              |
|                                         | 0 First rehabilitation admission                                                                                                                                                               |
|                                         | 1 Readmission for rehabilitation                                                                                                                                                               |
| RUG ADL on admission                    | RUG ADL (Resource Utilization Groups Activities of Daily Living) score as assessed on admission. Cumulative score out of 18.                                                                   |
| Source of referral to palliative care   | Source of referral to the DH Palliative Care Program (Care Type 8).                                                                                                                            |
|                                         | 01 Community sector – GP                                                                                                                                                                       |
|                                         | 02 Community sector – Specialist                                                                                                                                                               |
|                                         | 03 Community sector - Self, Carer, Other (family member, neighbor)                                                                                                                             |
|                                         | 04 Community sector- Community-based agency                                                                                                                                                    |
|                                         | 05 Hospital - Public - Admitted patient                                                                                                                                                        |
|                                         | 06 Hospital - Private - Admitted patient                                                                                                                                                       |
|                                         | 07 Hospital - Outpatient - Non-admitted                                                                                                                                                        |
|                                         | 08 Residential care - Nursing home/hostel                                                                                                                                                      |
| 09 Other                                |                                                                                                                                                                                                |
| <b>Data Field Description</b>           | <b>Definition</b>                                                                                                                                                                              |
| 5-year age groups                       | Five-year age groups                                                                                                                                                                           |
|                                         | 00-04 05-09 10-14 15-19 20-24                                                                                                                                                                  |
|                                         | 25-29 30-34 35-39 40-44 45-49                                                                                                                                                                  |
|                                         | 50-54 55-59 60-64 65-69 70-74                                                                                                                                                                  |
|                                         | 75-79 80-84 85+                                                                                                                                                                                |
| Sex of patient                          | The sex of the patient:                                                                                                                                                                        |
|                                         | 1 Male                                                                                                                                                                                         |
|                                         | 2 Female                                                                                                                                                                                       |
|                                         | 3 Indeterminate (only for infants < 90 days old)                                                                                                                                               |
|                                         | 4 Intersex                                                                                                                                                                                     |
| Statistical local area (5 digits)       | The patient's Statistical Local Area of residence. Based on Australian Standard Geographical Classification (ASGC) 2011 boundaries and derived from the locality and postcode.                 |
| Local government area                   | The patient's Local Government Area of residence. Based on Australian Standard Geographical Classification (ASGC) 2004 boundaries for Victoria, and 1999 boundaries for the rest of Australia. |
| Region of residence                     | The code for the Department of Health/Human Services Region in which the patient resides; is derived from the field 'SLA'.                                                                     |
|                                         | 1 Barwon South Western                                                                                                                                                                         |
|                                         | 2 Grampians                                                                                                                                                                                    |
|                                         | 3 Loddon Mallee                                                                                                                                                                                |
|                                         | 4 Hume                                                                                                                                                                                         |
|                                         | 5 Gippsland                                                                                                                                                                                    |
|                                         | 8 Eastern                                                                                                                                                                                      |
|                                         | 9 Southern                                                                                                                                                                                     |
|                                         | A North-Western                                                                                                                                                                                |
|                                         | I Interstate                                                                                                                                                                                   |
| M Missing                               |                                                                                                                                                                                                |
| State of residence                      | State of patient residence derived from SLA:                                                                                                                                                   |
|                                         | 0 Unknown/Itinerate/Overseas                                                                                                                                                                   |
|                                         | 1 New South Wales                                                                                                                                                                              |

|                                     |                                                                                                                                                                                         |
|-------------------------------------|-----------------------------------------------------------------------------------------------------------------------------------------------------------------------------------------|
|                                     | 2 Victoria                                                                                                                                                                              |
|                                     | 3 Queensland                                                                                                                                                                            |
|                                     | 4 South Australia                                                                                                                                                                       |
|                                     | 5 Western Australia                                                                                                                                                                     |
|                                     | 6 Tasmania                                                                                                                                                                              |
|                                     | 7 Northern Territory                                                                                                                                                                    |
|                                     | 8 Australian Capital Territory                                                                                                                                                          |
|                                     | 9 Other Territories                                                                                                                                                                     |
| Carer availability                  | A record of whether a person, such as a family member, friend or neighbor has been identified as providing regular ongoing care or assistance, which is not linked to a formal service. |
|                                     | 1 Carer not needed/ not applicable                                                                                                                                                      |
|                                     | 2 Lives alone, has a carer                                                                                                                                                              |
|                                     | 3 Lives alone, has no carer                                                                                                                                                             |
|                                     | 4 Lives with another, has no carer                                                                                                                                                      |
|                                     | 5 Lives with another, has a resident carer                                                                                                                                              |
|                                     | 6 Lives with another, has a non-resident carer                                                                                                                                          |
|                                     | 7 Lives in a mutually dependent situation                                                                                                                                               |
| 8 Missing or not recorded           |                                                                                                                                                                                         |
| Hospital Region                     | Metropolitan/Rural flag of hospitals.                                                                                                                                                   |
| <b>Data Field Description</b>       | <b>Definition</b>                                                                                                                                                                       |
| Month and Year of separation        | Month and Year of separation, eg. Jul, Aug                                                                                                                                              |
| Length of stay                      | The length of stay is calculated during the PRS/2 processing, summing the total patient days in each of the status segments minus leave with and without permission days.               |
| Hospital in the home length of stay | Hospital in the Home Length of Stay.                                                                                                                                                    |
| Hospital in the Home separation     | Flag to indicate that the episode includes a “Hospital In The Home” component.                                                                                                          |
| Patient type                        | Patient type derived from Separation Account:                                                                                                                                           |
|                                     | H Public                                                                                                                                                                                |
|                                     | P Private                                                                                                                                                                               |
|                                     | S Compensable                                                                                                                                                                           |
|                                     | V DVA                                                                                                                                                                                   |
| Duration of unit stay               | X Ineligible                                                                                                                                                                            |
|                                     | Identifies the duration of stay within a specific campus unit.                                                                                                                          |
|                                     | E Entire admission was at the specified campus unit                                                                                                                                     |
| Barthel index on separation         | P Part of the admission was at the specified campus unit.                                                                                                                               |
|                                     | The Barthel Index on separation is assessed on the day on which the decision is taken to cease rehabilitation (for Care Types F, E, 2, 6, 7, 9 or K).                                   |
| RUG ADL on separation               | RUGADL (Resource Utilization Groups Activities of Daily Living) score as assessed on separation (for Care Type 8). Cumulative score out of 18.                                          |
| <b>Data Field Description</b>       | <b>Definition</b>                                                                                                                                                                       |
| Victorian Adjusted AR-DRGv6         | Victorian Adjusted Australian Revised Diagnosis Related Group v6 is the same as AR-DRG v6 except where adjustments are made utilising the VIC-DRG6 field, for case-mix payments.        |
| Victorian adjusted AR-MDCv6         | The Australian Revised Major Diagnostic Category (AR-MDC) Version 6.0 is derived through the same grouping process as the AR-DRG v6.                                                    |
| Clinical specialty                  | Clinical specialty mapped from VIC. DRG v6.0x (665 DRGs mapped into 27 Clinical Specialties):                                                                                           |
|                                     | 01 Neurosurgery                                                                                                                                                                         |

|                                                     |                                                                                                                                                                                                                   |
|-----------------------------------------------------|-------------------------------------------------------------------------------------------------------------------------------------------------------------------------------------------------------------------|
|                                                     | 03 Vascular                                                                                                                                                                                                       |
|                                                     | 04 Orthopedics                                                                                                                                                                                                    |
|                                                     | 05 Neurology                                                                                                                                                                                                      |
|                                                     | 06 Ophthalmology                                                                                                                                                                                                  |
|                                                     | 07 ENT                                                                                                                                                                                                            |
|                                                     | 08 Cardiothoracic                                                                                                                                                                                                 |
|                                                     | 09 Cardiology                                                                                                                                                                                                     |
|                                                     | 10 Rehabilitation                                                                                                                                                                                                 |
|                                                     | 11 Dental                                                                                                                                                                                                         |
|                                                     | 12 Rheumatology                                                                                                                                                                                                   |
|                                                     | 13 Plastics                                                                                                                                                                                                       |
|                                                     | 14 General Medicine                                                                                                                                                                                               |
|                                                     | 15 Psychiatry                                                                                                                                                                                                     |
|                                                     | 16 General Surgery                                                                                                                                                                                                |
|                                                     | 17 Nephrology                                                                                                                                                                                                     |
|                                                     | 18 Renal Dialysis                                                                                                                                                                                                 |
|                                                     | 19 Urology                                                                                                                                                                                                        |
|                                                     | 20 Gynecology                                                                                                                                                                                                     |
|                                                     | 21 Obstetrics & Ante-natal                                                                                                                                                                                        |
|                                                     | 22 Neonatology                                                                                                                                                                                                    |
|                                                     | 23 Haematology                                                                                                                                                                                                    |
|                                                     | 24 Respiratory                                                                                                                                                                                                    |
|                                                     | 25 Oncology/Radiology                                                                                                                                                                                             |
|                                                     | 26 Endocrinology                                                                                                                                                                                                  |
|                                                     | 27 Gastroenterology                                                                                                                                                                                               |
|                                                     | 28 Other/Ungroupable                                                                                                                                                                                              |
| DRG Type                                            | DRG type:                                                                                                                                                                                                         |
|                                                     | M Medical                                                                                                                                                                                                         |
|                                                     | S Surgical                                                                                                                                                                                                        |
|                                                     | O Other                                                                                                                                                                                                           |
| DRG Coding status                                   | Coding status of separation records:                                                                                                                                                                              |
|                                                     | C Coded                                                                                                                                                                                                           |
|                                                     | P Problem DRG (AR-DRG 6.0: 801A, 801B, 801C)                                                                                                                                                                      |
|                                                     | <Blank> Not Coded                                                                                                                                                                                                 |
| First external-cause activity                       | The first diagnosis code is in the range U50 – U73.                                                                                                                                                               |
| First external-cause place of occurrence            | The first diagnosis code commencing with Y92.                                                                                                                                                                     |
| Principal external-cause                            | If the first diagnosis is an injury or poisoning, i.e., in the range S00 to T98, then the principal external cause is the first code in the range of V01 to Y91 or Y95 to Y98.                                    |
| Principal external-cause activity                   | If the first diagnosis is an injury or poisoning i.e., in the range S00 to T98, and the principal external cause in the range V01-Y34, then the activity is the first diagnosis code in the range U50 – U73.      |
| Principal external-cause place of occurrence        | If the first diagnosis is an injury or poisoning, i.e., in the range S00 to T98, and the principal external cause in range V01 – Y89, then “place of occurrence” is the first diagnosis code commencing with Y92. |
| Duration of stay (hours) in the intensive care unit | The total duration of stay (hours) in an approved Intensive Care Unit (ICU) or Neonatal Intensive Care Unit (NICU), during this episode of care.                                                                  |
|                                                     | Duration is reported in hours and rounded up to the nearest hour.                                                                                                                                                 |
| Duration of Mechanical Ventilation in ICU           | The total duration of Mechanical Ventilation (MV) in hours provided in an approved Intensive Care Unit (ICU) or Neonatal Intensive Care (NICU) during this episode of care.                                       |

|                                      |                                                                                                                                                                                                                                                                              |
|--------------------------------------|------------------------------------------------------------------------------------------------------------------------------------------------------------------------------------------------------------------------------------------------------------------------------|
| Duration of Non-Invasive Ventilation | The total number of hours of non-invasive ventilatory assistance given via any route other than intubation or tracheostomy, provided to patients in an approved Neonatal Intensive Care Unit (NICU) or Special Care Nursery (SCN) or Intensive Care Unit (ICU).              |
| Clinical Sub-program                 | The diagnosis is based on the body system manifesting the reason for rehabilitation. Reported for Care Types 2, 6, 7, K and P. Clinical Sub-Program is assigned by the treating clinician.                                                                                   |
| Impairment                           | A code is assigned, based on the body system manifesting the reason for rehabilitation. Only reported for Sub-acute records. Reported for Care Type 2,6, P, R1 and R2. Introduction of Version 1 Australian Impairment code-set for Sub-Acute episodes as an optional field. |
| <b>Data Field Description</b>        | <b>Definition</b>                                                                                                                                                                                                                                                            |
| Mental Health legal status           | A funding-source indicator for involuntary patients:                                                                                                                                                                                                                         |
|                                      | 1 Involuntary for all or part of this episode                                                                                                                                                                                                                                |
|                                      | 2 Not involuntary at any time during this episode                                                                                                                                                                                                                            |
|                                      | 9 Not Applicable                                                                                                                                                                                                                                                             |
| Admission Source                     | Describes where the patient was residing or living before the commencement of an episode of care.                                                                                                                                                                            |
|                                      | A Transfer from mental health residential facility                                                                                                                                                                                                                           |
|                                      | B Transfer from Transition Care bed-based program                                                                                                                                                                                                                            |
|                                      | H Admission from private residence/ accommodation                                                                                                                                                                                                                            |
|                                      | N Transfer from aged care residential facility                                                                                                                                                                                                                               |
|                                      | S Statistical Admission (change in Care Type within this hospital)                                                                                                                                                                                                           |
|                                      | T* Transfer from acute/ extended care/ rehabilitation/ geriatric center                                                                                                                                                                                                      |
|                                      | <b>* Requires an admission transfer code</b>                                                                                                                                                                                                                                 |
| Y Birth Episode                      |                                                                                                                                                                                                                                                                              |
| <b>Data Field Description</b>        | <b>Definition</b>                                                                                                                                                                                                                                                            |
| Encrypted Campus code                | Indicates the hospital campus where the episode of care was provided. The patient activity must be reported under the campus code at which it occurred.                                                                                                                      |
| Interpreter Required                 | The patient's need for an interpreter, as perceived by the patient or person consenting for the patient.                                                                                                                                                                     |
|                                      | 1 Yes                                                                                                                                                                                                                                                                        |
|                                      | 2 No                                                                                                                                                                                                                                                                         |
|                                      | 9 Not Stated/Inadequately described                                                                                                                                                                                                                                          |
| Marital status                       | The current marital or living status of the patient at the time of admission:                                                                                                                                                                                                |
|                                      | 1 Never married                                                                                                                                                                                                                                                              |
|                                      | 2 Widowed                                                                                                                                                                                                                                                                    |
|                                      | 3 Divorced                                                                                                                                                                                                                                                                   |
|                                      | 4 Separated                                                                                                                                                                                                                                                                  |
|                                      | 5 Married                                                                                                                                                                                                                                                                    |
|                                      | 6 De Facto                                                                                                                                                                                                                                                                   |
| 9 Not stated/inadequately described  |                                                                                                                                                                                                                                                                              |
| Preferred Language                   | Language (including sign language) is most preferred by the patient for communication. This may be a language other than English even where the person can speak fluent English.                                                                                             |
| Indigenous status                    | The indigenous status of the patient as determined by patient self-identification.                                                                                                                                                                                           |
| <b>Data Field Description</b>        | <b>Definition</b>                                                                                                                                                                                                                                                            |
| Encrypted Transfer Source (FROM)     | Identification of the hospital campus the person has been transferred from, following separation from that hospital.                                                                                                                                                         |
| Account class on separation          | The patient account classification on separation.                                                                                                                                                                                                                            |



|                                                                   |                                                                                                                                                                                                                 |
|-------------------------------------------------------------------|-----------------------------------------------------------------------------------------------------------------------------------------------------------------------------------------------------------------|
| Encrypted Transfer destination (TO)                               | Identification of the hospital campus to which the patient is transferred after separation from this hospital.                                                                                                  |
|                                                                   | Y Yes                                                                                                                                                                                                           |
|                                                                   | N No                                                                                                                                                                                                            |
|                                                                   | U Uncoded (but eligible for WIES funding when coded)                                                                                                                                                            |
| Separation Mode                                                   | Type of separation:                                                                                                                                                                                             |
|                                                                   | A Separation and transfer to mental health residential facility                                                                                                                                                 |
|                                                                   | B Separation and transfer to Transition Care bed-based program                                                                                                                                                  |
|                                                                   | D Death                                                                                                                                                                                                         |
|                                                                   | H Separation to private residence/accommodation                                                                                                                                                                 |
|                                                                   | S Statistical Separation                                                                                                                                                                                        |
|                                                                   | N Separation and transfer to aged care residential facility                                                                                                                                                     |
|                                                                   | T* Separation and transfer to another acute hospital/extended care/rehabilitation/geriatric center                                                                                                              |
|                                                                   | R Separation and transfer to Restorative Care bed-based program                                                                                                                                                 |
|                                                                   | <b>* Requires separation transfer code</b>                                                                                                                                                                      |
| Z Left against medical advice                                     |                                                                                                                                                                                                                 |
| Separation referral                                               | Clinical care and support services are arranged by the hospital to meet the person's recuperative needs when discharged to private accommodation or home. Up to four referrals can be transmitted in one field. |
|                                                                   | A Referral to Aged Care Assessment Service (ACAS), arranged before discharge                                                                                                                                    |
|                                                                   | B Community palliative care support arranged before discharge                                                                                                                                                   |
|                                                                   | C Mental health community services arranged before discharge                                                                                                                                                    |
|                                                                   | D Psychiatric disability support services arranged before discharge                                                                                                                                             |
|                                                                   | F Domiciliary postnatal care arranged before discharge                                                                                                                                                          |
|                                                                   | G Referral to general practitioner arranged before discharge                                                                                                                                                    |
|                                                                   | K Referral to Aboriginal and Torres Strait Islander (ATSI) service, arranged before discharge                                                                                                                   |
|                                                                   | L Alcohol and drug treatment service arranged before discharge                                                                                                                                                  |
|                                                                   | M Referral to a community rehabilitation center arranged before discharge                                                                                                                                       |
|                                                                   | P Post-Acute Care Program services arranged before discharge                                                                                                                                                    |
|                                                                   | R Other clinical care &/or support services arranged before discharge                                                                                                                                           |
|                                                                   | S Referral to private psychiatrist arranged before discharge                                                                                                                                                    |
|                                                                   | T Referral to Transition Care home-based program, arranged before discharge                                                                                                                                     |
|                                                                   | U Home nursing support arranged before discharge                                                                                                                                                                |
| X No referral or support services were arranged before discharge. |                                                                                                                                                                                                                 |

**Supplementary Table 2:** A complete list of ICD-10 variables extracted from the VDI database.

| <b>Data Field Description</b>       | <b>Justification</b>                                 |
|-------------------------------------|------------------------------------------------------|
| Cause of Death                      |                                                      |
| Deceased Date of Death (Month/year) | Estimation of long-term survival after ICU admission |
| Deceased Age at Death (Month/year)  | Estimation of long-term survival after ICU admission |

**Supplementary Table 3: ICD-10 codes used to estimate the ICD-10mFI.**

|                                                                                    |                                                                                                                                                                                                                                                                                                                                                                                                                                        |
|------------------------------------------------------------------------------------|----------------------------------------------------------------------------------------------------------------------------------------------------------------------------------------------------------------------------------------------------------------------------------------------------------------------------------------------------------------------------------------------------------------------------------------|
| <b>Variable 1: "Functional status (not independent)"</b>                           | 1. H54 – Blindness and low vision<br>2. R26.0- R26.9 – Gait problems<br>3. R27.0 -R27.9 – Lack of coordination<br>4. R41 – Sarcopenia<br>5. R41.81 – age-related cognitive decline<br>6. R54 – age-related physical disability<br>7. S72 – fracture of the femur<br>8. Z73 – Life management difficulty<br>9. Z74.1 – Need for assistance<br>10. Z73.6 – Activities of daily living dysfunction<br>11. Z74 – Care-provider dependency  |
| <b>Variable 2: "History of hypertension requiring medication"</b>                  | 12. I10 – Essential hypertension<br>13. I11 – Hypertensive heart disease<br>14. I12 – Hypertensive kidney disease<br>15. I13 – Hypertensive heart and kidney disease<br>16. I15 – Secondary hypertension                                                                                                                                                                                                                               |
| <b>Variable 3: "History of chronic obstructive pulmonary disease or pneumonia"</b> | 17. J12 – viral pneumonia<br>18. J13 – pneumonia due to streptococcal pneumonia<br>19. J14 – pneumonia due to Hemophilus influenzae<br>20. J15 – Bacterial pneumonia, not elsewhere classified<br>21. J16 – Pneumonia due to other infectious organisms<br>22. J17 – Pneumonia in diseases classified elsewhere<br>23. J18 – Pneumonia, organism unspecified<br>24. J43 – Emphysema<br>25. J44 – Chronic obstructive pulmonary disease |
| <b>Variable 4: "History of impaired sensorium"</b>                                 | 26. A81.0 – Creuksfeld Jacob Disease<br>27. F00-F03 – Delirium superimposed with dementia<br>28. F01 – Vascular Dementia<br>29. F04 – Organic Amnesia Syndrome<br>30. F05 – Delirium<br>31. F06 – Memory disturbance<br>32. F10 – Amnesia related to Alcohol<br>33. F11-F19 – Amnesia related to psychoactive agents<br>34. G20 - Parkinson’s disease<br>35. G30 – Alzheimer’s Dementia<br>36. H35 – Macular degeneration              |
| <b>Variable 5: "History of diabetes mellitus"</b>                                  | 37. E10 - Type 1 diabetes mellitus<br>38. E11 - Type 2 diabetes mellitus<br>39. E13 – Other specified diabetes mellitus<br>40. E14 - Unspecified diabetes mellitus                                                                                                                                                                                                                                                                     |
| <b>Variable 6: "History of myocardial infarction"</b>                              | 41. I21 – Acute myocardial infarction<br>42. I22 – Subsequent myocardial infarction<br>43. I25 – Chronic ischemic heart disease                                                                                                                                                                                                                                                                                                        |
| <b>Variable 7: "History of congestive heart failure"</b>                           | 44. I50 – Heart failure<br>45. U80.2 – Chronic heart failure                                                                                                                                                                                                                                                                                                                                                                           |
| <b>Variable 8: "History of stroke with neurologic deficit"</b>                     | 46. I61 – Intracerebral hemorrhage<br>47. I63 – Cerebral infarction<br>48. I69 – Sequelae of cerebrovascular disease                                                                                                                                                                                                                                                                                                                   |
| <b>Variable 9: "History of TIA or stroke without neurological deficit"</b>         | 49. G45 – Transient cerebral ischemic attacks and related syndromes                                                                                                                                                                                                                                                                                                                                                                    |
| <b>Variable 10: "History of PCI, angina or stenting"</b>                           | 50. I20 – Angina pectoris                                                                                                                                                                                                                                                                                                                                                                                                              |
| <b>Variable 11: "History of Peripheral vascular disease or ischemic rest pain"</b> | 51. I70.2 – Atherosclerosis of arteries of extremities<br>52. I73 - Peripheral vascular disease<br>53. I77.9 - Peripheral arterial insufficiency<br>54. I77.1 - Obliterative peripheral arteries                                                                                                                                                                                                                                       |

**Supplementary Table 4:** Comparison between included (n=7,001) vs excluded (n=13,457).

|                                                                                                                                                                                                           | <b>Overall</b> | <b>Excluded Patients</b> | <b>Included Patients</b> | <b>p-value</b>   |
|-----------------------------------------------------------------------------------------------------------------------------------------------------------------------------------------------------------|----------------|--------------------------|--------------------------|------------------|
| <b>Number of patients, % (n)</b>                                                                                                                                                                          | 20458          | 13457                    | 7001                     | -                |
| <b>Age (years), mean (SD)</b>                                                                                                                                                                             | 61.8 (17.6)    | 62.5 (17.5)              | 60.5 (17.6)              | <b>&lt;0.001</b> |
| <b>Male, % (n)</b>                                                                                                                                                                                        | 57.0 (11689)   | 55.9 (7523)              | 59.5 (4166)              | <b>&lt;0.001</b> |
| <b>Clinical Frailty Scale score, mean (SD)</b>                                                                                                                                                            | 3.4 (1.5)      | 3.5 (1.9) (2439)         | 3.3 (1.5)                | <b>&lt;0.001</b> |
| <b>ICU Admission Type, % (n)</b>                                                                                                                                                                          |                |                          |                          |                  |
| - Elective Surgery                                                                                                                                                                                        | 23.8 (4877)    | 23.3 (3137)              | 24.9 (1740)              | <b>0.014</b>     |
| <b>Comorbidities, % (n)</b>                                                                                                                                                                               |                |                          |                          |                  |
| - Chronic respiratory disorder                                                                                                                                                                            | 8.5 (1741)     | 8.9 (1202)               | 7.7 (539)                | <b>0.003</b>     |
| - Cardiovascular disorder                                                                                                                                                                                 | 8.6 (1757)     | 9.6 (1287)               | 6.7 (470)                | <b>&lt;0.001</b> |
| - Chronic renal failure                                                                                                                                                                                   | 4.3 (874)      | 4.6 (614)                | 3.7 (260)                | <b>0.004</b>     |
| - Hepatic failure                                                                                                                                                                                         | 2.6 (536)      | 2.6 (355)                | 2.6 (181)                | 0.82             |
| - Cirrhosis                                                                                                                                                                                               | 2.6 (539)      | 2.7 (358)                | 2.6 (181)                | 0.75             |
| - Immune disorders                                                                                                                                                                                        | 1.7 (351)      | 1.5 (200)                | 2.2 (151)                | <b>&lt;0.001</b> |
| - Immunodeficiency                                                                                                                                                                                        | 5 (1020)       | 4.6 (625)                | 5.6 (395)                | <b>0.002</b>     |
| - Metastatic cancer                                                                                                                                                                                       | 3 (623)        | 3.3 (440)                | 2.6 (183)                | <b>0.001</b>     |
| - Lymphoma                                                                                                                                                                                                | 1.1 (218)      | 1.2 (166)                | 0.7 (52)                 | <b>0.001</b>     |
| - Leukaemia                                                                                                                                                                                               | 1.4 (279)      | 1.2 (168)                | 1.6 (111)                | <b>0.049</b>     |
| Charlson Comorbidity Index                                                                                                                                                                                | 0 (0-2)        | 0 (0-2)                  | 0 (0-2)                  | 0.85             |
| Pre-ICU (Hours), median (IQR)                                                                                                                                                                             | 8 (4-22.2)     | 8.3 (4.1-22.8)           | 7.5 (3.8-20.1)           | <b>&lt;0.001</b> |
| <b>Scoring and Risk of Death scores</b>                                                                                                                                                                   |                |                          |                          |                  |
| - APACHE-2 score, mean (SD)                                                                                                                                                                               | 15.6 (7.8)     | 15.7 (8.0)               | 15.4 (7.5)               | <b>0.034</b>     |
| - APACHE-3 score, mean (SD)                                                                                                                                                                               | 52.4 (26.2)    | 52.6 (26.9)              | 51.9 (24.7)              | 0.06             |
| - ANZROD Score, (%) median (IQR)                                                                                                                                                                          | 2.7 (0.8-10)   | 2.9 (0.8-10)             | 2.3 (0.7-9.1)            | <b>&lt;0.001</b> |
| <b>Organ failure and supports, % (n)</b>                                                                                                                                                                  |                |                          |                          |                  |
| - Invasive ventilation                                                                                                                                                                                    | 38.4 (7858)    | 34.1 (4592)              | 46.7 (3266)              | <b>&lt;0.001</b> |
| - Renal replacement therapy                                                                                                                                                                               | 3.3 (671)      | 2.3 (314)                | 5.1 (357)                | <b>&lt;0.001</b> |
| <b>Mortality, % (n)</b>                                                                                                                                                                                   |                |                          |                          |                  |
| - ICU Mortality                                                                                                                                                                                           | 6.5 (1328)     | 6.4 (856)                | 6.7 (472)                | 0.30             |
| - Hospital Mortality                                                                                                                                                                                      | 9.4 (1924)     | 9.5 (1282)               | 9.2 (642)                | 0.39             |
| - 12-month Mortality                                                                                                                                                                                      | 14.6 (2995)    | 14.8 (1989)              | 14.4 (1006)              | 0.43             |
| <b>Length of Stay, median (IQR)</b>                                                                                                                                                                       |                |                          |                          |                  |
| - ICU length of stay (hours)                                                                                                                                                                              | 46 (24-89)     | 44 (23-84)               | 47 (24-93)               | <b>&lt;0.001</b> |
| - Hospital length of stay (days)                                                                                                                                                                          | 7 (4-14)       | 7 (4-13)                 | 8 (4-15)                 | <b>&lt;0.001</b> |
| ICU >10 days                                                                                                                                                                                              | 5.2 (1057)     | 4.6 (617)                | 6.3 (440)                | <b>&lt;0.001</b> |
| Readmission                                                                                                                                                                                               | 4.0 (823)      | 4.1 (547)                | 3.9 (276)                | 0.67             |
| <b>Discharge Destination, % (n)</b>                                                                                                                                                                       |                |                          |                          |                  |
| - Usual residence                                                                                                                                                                                         | 62.3 (12745)   | 56.9 (7657)              | 64.2 (4496)              | <b>&lt;0.001</b> |
| SD = standard deviation; n = number; IQR = interquartile range; ICU = intensive care unit; ICU – intensive care unit; APACHE - Acute Physiology and Chronic Health Evaluation; ANZROD – ANZ Risk of death |                |                          |                          |                  |

**Supplementary Table 5:** Reduction over time in the proportion of patients without a documented CFS in the ANZICS database.

| Month/year     | 20,457 hospitalizations during the study period |             |             | 14,943 patients that were linked |             |             |
|----------------|-------------------------------------------------|-------------|-------------|----------------------------------|-------------|-------------|
|                | CFS recorded                                    | CFS missing | Missing (%) | CFS recorded                     | CFS missing | Missing (%) |
| April 2017     | 229                                             | 1169        | 83.6%       | 189                              | 899         | 82.6%       |
| May 2017       | 244                                             | 1256        | 83.7%       | 202                              | 934         | 82.2%       |
| June 2017      | 280                                             | 1193        | 80.9%       | 236                              | 844         | 78.1%       |
| July 2017      | 325                                             | 1125        | 77.6%       | 256                              | 807         | 75.9%       |
| August 2017    | 588                                             | 1002        | 63.0%       | 441                              | 739         | 62.6%       |
| September 2017 | 510                                             | 900         | 63.8%       | 378                              | 642         | 62.9%       |
| October 2017   | 522                                             | 874         | 62.6%       | 407                              | 626         | 60.6%       |
| November 2017  | 556                                             | 676         | 54.9%       | 434                              | 496         | 53.3%       |
| December 2017  | 729                                             | 507         | 41.0%       | 563                              | 388         | 40.8%       |
| January 2018   | 761                                             | 464         | 37.9%       | 593                              | 312         | 34.5%       |
| February 2018  | 755                                             | 474         | 38.6%       | 611                              | 340         | 35.8%       |
| March 2018     | 936                                             | 486         | 34.2%       | 679                              | 347         | 33.8%       |
| April 2018     | 892                                             | 321         | 26.5%       | 654                              | 234         | 26.4%       |
| May 2018       | 1066                                            | 315         | 22.8%       | 798                              | 222         | 21.8%       |
| June 2018      | 1046                                            | 256         | 19.7%       | 560                              | 113         | 16.8%       |

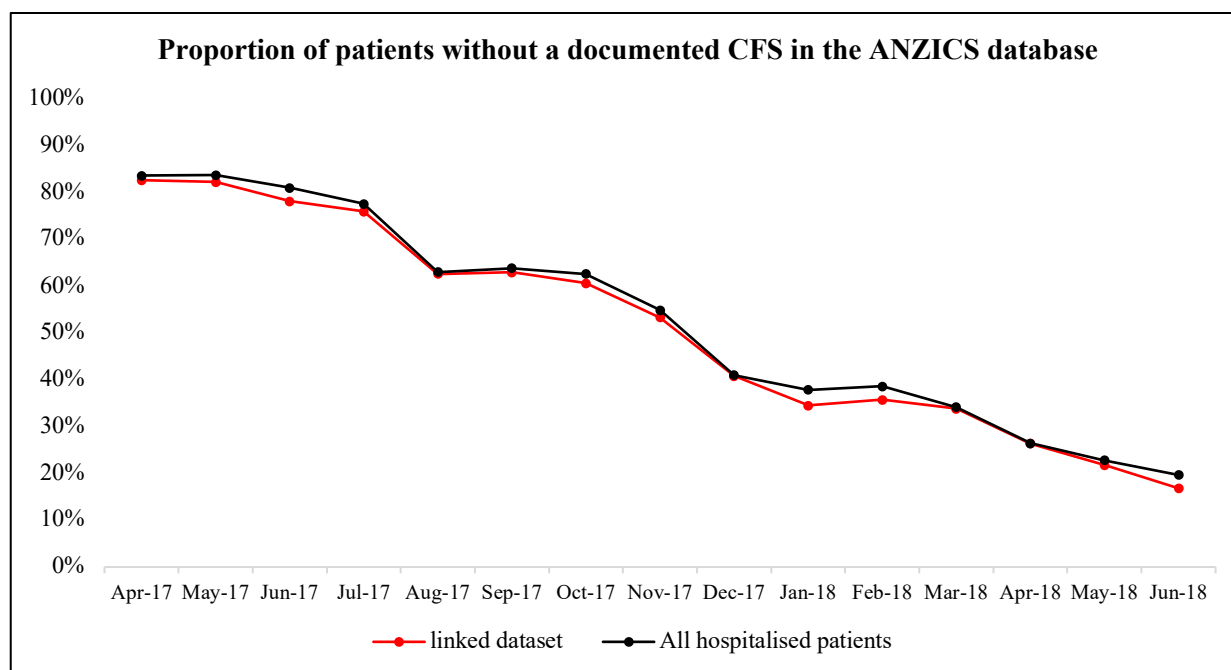



**Supplementary Table 6:** Variations observed in the proportion of each of the 11 comorbidity measures of ICD-10 modified Frailty Index (ICD-10mFI) between the CFS and the ICD-10mFI.

| modified frailty index (mFI) variables                                | Total No. of patients (N=7001) | Clinical Frailty Score      |                         | ICD-10 Modified Frailty Index |                         |
|-----------------------------------------------------------------------|--------------------------------|-----------------------------|-------------------------|-------------------------------|-------------------------|
|                                                                       |                                | non-frail patients (N=5678) | frail patients (N=1323) | non-frail patients (N=5910)   | frail patients (N=1091) |
|                                                                       | n/N (%)                        | n/N (%)                     | % (n/N)                 | n/N (%)                       | % (n/N)                 |
| Functional status (not independent)                                   | 2.4 (170/7001)                 | 2.1 (119)                   | 3.9 (51)                | 2.2 (138)                     | 5.2 (32)                |
| History of hypertension requiring medication                          | 44.9 (850/7001)                | 12.1 (686)                  | 12.4 (164)              | 9.2 (586)                     | 42.9 (264)              |
| History of chronic obstructive pulmonary disease or pneumonia         | 12.9 (903/7001)                | 10.3 (586)                  | 24.0 (317)              | 9.9 (631)                     | 44.2 (272)              |
| History of impaired sensorium                                         | 16.5 (1152/7001)               | 16.0 (910)                  | 18.3 (242)              | 14.0 (893)                    | 42.0 (259)              |
| History of diabetes mellitus                                          | 24.8 (1735/7001)               | 23.1 (1314)                 | 31.8 (421)              | 20.6 (1317)                   | 67.9 (418)              |
| History of myocardial infarction                                      | 16.8 (1174/7001)               | 18.1 (1030)                 | 10.9 (144)              | 12.9 (824)                    | 56.8 (350)              |
| History of congestive heart failure                                   | 8.0 (560/7001)                 | 6.4 (362)                   | 15.0 (198)              | 4.9 (314)                     | 39.9 (246)              |
| History of stroke with neurologic deficit                             | 3.0 (207/7001)                 | 3.0 (169)                   | 2.9 (38)                | 2.3 (145)                     | 10.1 (62)               |
| History of percutaneous angiographic intervention, angina or stenting | 2.2 (151/7001)                 | 2.5 (140)                   | 0.8 (11)                | 1.1 (73)                      | 12.7 (78)               |
| History of Peripheral vascular disease or ischemic rest pain          | 1.2 (81/7001)                  | 1.1 (63)                    | 1.4 (18)                | 0.9 (58)                      | 3.7 (58)                |
| History of Transient ischemic attack or stroke                        | 0.2 (13/7001)                  | 0.2 (12)                    | 0.1 (1)                 | 0.1 (9)                       | 0.6 (4)                 |

^ Except for history of hypertension requiring medication (p=0.75), stroke with a neurological deficit (p=0.84), history of peripheral vascular deficit or Ischaemic rest pain (p=0.44) and history of transient ischemic attack (0.30), all other comparisons between frail and not-frail for CFS were statistically significant. History of impaired sensorium had a p=0.045, while the rest had a p<0.001.

^^ All comparisons between frail and not-frail for mFI scores were statistically significant and had a p<0.001, except for Transient ischemic attack (p=0.005).

**Supplementary Table 7: Unadjusted outcomes.**

|                                                                                                                                                                                                                                                                                                                                                                                                                                                                                                                                                                                                                                                                                                | Overall<br>% (n) | Clinical Frailty Scale <sup>^</sup> |               | ICD-10 Modified Frailty Index <sup>^^</sup> |               |
|------------------------------------------------------------------------------------------------------------------------------------------------------------------------------------------------------------------------------------------------------------------------------------------------------------------------------------------------------------------------------------------------------------------------------------------------------------------------------------------------------------------------------------------------------------------------------------------------------------------------------------------------------------------------------------------------|------------------|-------------------------------------|---------------|---------------------------------------------|---------------|
|                                                                                                                                                                                                                                                                                                                                                                                                                                                                                                                                                                                                                                                                                                |                  | Non-frail                           | Frail         | Non-frail                                   | Frail         |
| <b>Mortalities</b>                                                                                                                                                                                                                                                                                                                                                                                                                                                                                                                                                                                                                                                                             |                  |                                     |               |                                             |               |
| - ICU Mortality                                                                                                                                                                                                                                                                                                                                                                                                                                                                                                                                                                                                                                                                                | 6.7 (472)        | 5.8 (328)                           | 10.9 (144)    | 6.5 (413)                                   | 9.6 (59)      |
| - Hospital Mortality                                                                                                                                                                                                                                                                                                                                                                                                                                                                                                                                                                                                                                                                           | 9.2 (642)        | 7.6 (433)                           | 15.8 (209)    | 8.7 (554)                                   | 14.3 (88)     |
| - 28-Day Mortality                                                                                                                                                                                                                                                                                                                                                                                                                                                                                                                                                                                                                                                                             | 9.0 (630)        | 7.4 (420)                           | 15.9 (210)    | 8.5 (542)                                   | 14.3 (88)     |
| - 90-day Mortality                                                                                                                                                                                                                                                                                                                                                                                                                                                                                                                                                                                                                                                                             | 11.8 (828)       | 9.4 (533)                           | 22.3 (295)    | 11.2 (716)                                  | 18.2 (112)    |
| - 6-month Mortality                                                                                                                                                                                                                                                                                                                                                                                                                                                                                                                                                                                                                                                                            | 13.5 (944)       | 10.6 (600)                          | 26.0 (344)    | 12.7 (814)                                  | 21.1 (130)    |
| - 1-year Mortality                                                                                                                                                                                                                                                                                                                                                                                                                                                                                                                                                                                                                                                                             | 14.4 (1005)      | 11.3 (642)                          | 27.4 (363)    | 13.6 (866)                                  | 22.6 (139)    |
| - ICU LOS (days)                                                                                                                                                                                                                                                                                                                                                                                                                                                                                                                                                                                                                                                                               | 1.9 (1.0-3.7)    | 1.8 (0.9-3.5)                       | 2.3 (1.2-4.2) | 1.8 (1.0-3.5)                               | 2.8 (1.3-5.1) |
| - Hospital LOS (days)                                                                                                                                                                                                                                                                                                                                                                                                                                                                                                                                                                                                                                                                          | 8 (4-15)         | 7 (4-14)                            | 9 (5-8)       | 7 (4-14)                                    | 12 (7-20)     |
| <b>Discharge Destination</b>                                                                                                                                                                                                                                                                                                                                                                                                                                                                                                                                                                                                                                                                   |                  |                                     |               |                                             |               |
| - Hospital Mortality                                                                                                                                                                                                                                                                                                                                                                                                                                                                                                                                                                                                                                                                           | 9.2 (642)        | 68.3 (3877)                         | 46.8 (619)    | 8.7 (554)                                   | 14.3 (88)     |
| - Usual residence                                                                                                                                                                                                                                                                                                                                                                                                                                                                                                                                                                                                                                                                              | 64.2 (4496)      | 68.3 (3877)                         | 46.8 (619)    | 65.1 (4154)                                 | 55.5 (342)    |
| - Nursing home discharge                                                                                                                                                                                                                                                                                                                                                                                                                                                                                                                                                                                                                                                                       | 1.6 (110)        | 0.8 (43)                            | 5.1 (67)      | 1.5 (93)                                    | 2.8 (17)      |
| - Transfer to rehabilitation                                                                                                                                                                                                                                                                                                                                                                                                                                                                                                                                                                                                                                                                   | 13.3 (932)       | 11.8 (671)                          | 19.7 (261)    | 13.0 (827)                                  | 17.0 (105)    |
| - Other acute hospital*                                                                                                                                                                                                                                                                                                                                                                                                                                                                                                                                                                                                                                                                        | 8.3 (581)        | 7.9 (449)                           | 10.0 (132)    | 9.9 (630)                                   | 9.7 (60)      |
| - Other**                                                                                                                                                                                                                                                                                                                                                                                                                                                                                                                                                                                                                                                                                      | 3.4 (240)        | 3.7 (212)                           | 2.1 (28)      | 6.4 (448)                                   | 0.6 (4)       |
| <p><i>ICU - intensive care unit, IQR - interquartile range; n - number; SD - standard deviation</i></p> <p><i>* Includes both transfer to ICU and acute hospital bed</i></p> <p><i>** Includes discharge to hospital in the home (n=19, 0.3%), mental residential care facility (n=73, 1%), other (n=38, 0.5%), discharge against medical advice (n=110, 1.6%)</i></p> <p><i>^ All comparisons between frail and not-frail for CFS scores were statistically significant and had a p&lt;0.001.</i></p> <p><i>^^ All comparisons between frail and not-frail for ICD-10mFI scores were statistically significant. Discharge destination had a p=0.015, while the rest had a p&lt;0.001.</i></p> |                  |                                     |               |                                             |               |



**Supplementary Table 8:** Logistic Regression analysis for short-term and long-term mortalities for all patients and those stratified based on age. Unadjusted and adjusted for ANZROD and sex. The odds ratio (OR) in bold represents statistically significant results. Graphically presented in Figure 2.

| Frail - outcome                                                                      | CFS        |           |             |           | ICD-10mFI  |           |             |           |
|--------------------------------------------------------------------------------------|------------|-----------|-------------|-----------|------------|-----------|-------------|-----------|
|                                                                                      | Unadjusted |           | Adjusted*   |           | Unadjusted |           | Adjusted*   |           |
|                                                                                      | OR         | 95%-CI    | OR          | 95%-CI    | OR         | 95%-CI    | OR          | 95%-CI    |
| <b>All patients (n=7001)</b>                                                         |            |           |             |           |            |           |             |           |
| ICU mortality                                                                        | 1.29       | 1.21-1.37 | <b>1.10</b> | 1.02-1.18 | 1.15       | 1.05-1.25 | 0.91        | 0.81-1.02 |
| Hospital mortality                                                                   | 1.36       | 1.29-1.44 | <b>1.21</b> | 1.13-1.29 | 1.22       | 1.14-1.32 | 1.01        | 0.91-1.12 |
| 28-day mortality                                                                     | 1.38       | 1.31-1.45 | <b>1.23</b> | 1.15-1.31 | 1.27       | 1.14-1.32 | 1.01        | 0.92-1.12 |
| 90-day mortality                                                                     | 1.45       | 1.38-1.52 | <b>1.33</b> | 1.25-1.41 | 1.26       | 1.18-1.35 | 1.07        | 0.99-1.16 |
| 6-month mortality                                                                    | 1.49       | 1.42-1.56 | <b>1.38</b> | 1.31-1.46 | 1.29       | 1.21-1.38 | <b>1.12</b> | 1.04-1.21 |
| 1-year mortality                                                                     | 1.49       | 1.43-1.56 | <b>1.38</b> | 1.31-1.46 | 1.30       | 1.22-1.38 | <b>1.13</b> | 1.05-1.22 |
| <b>Patients &lt;65 years (n=3637)</b>                                                |            |           |             |           |            |           |             |           |
| ICU mortality                                                                        | 1.25       | 1.14-1.37 | <b>1.20</b> | 1.07-1.35 | 1.31       | 1.14-1.51 | 1.05        | 0.87-1.26 |
| Hospital mortality                                                                   | 1.28       | 1.18-1.40 | <b>1.25</b> | 1.13-1.39 | 1.33       | 1.17-1.51 | 1.08        | 0.91-1.27 |
| 28-day mortality                                                                     | 1.30       | 1.20-1.42 | <b>1.19</b> | 1.09-1.29 | 1.35       | 1.18-1.53 | 1.09        | 0.92-1.30 |
| 90-day mortality                                                                     | 1.36       | 1.26-1.47 | <b>1.35</b> | 1.24-1.48 | 1.31       | 1.17-1.47 | 1.08        | 0.93-1.25 |
| 6-month mortality                                                                    | 1.42       | 1.32-1.52 | <b>1.43</b> | 1.31-1.55 | 1.34       | 1.20-1.50 | 1.13        | 0.98-1.29 |
| 1-year mortality                                                                     | 1.42       | 1.33-1.53 | <b>1.43</b> | 1.31-1.55 | 1.40       | 1.26-1.56 | <b>1.21</b> | 1.06-1.38 |
| <b>Patients 65-75 years (n=1735)</b>                                                 |            |           |             |           |            |           |             |           |
| ICU mortality                                                                        | 1.42       | 1.26-1.59 | <b>1.25</b> | 1.08-1.44 | 1.15       | 0.98-1.34 | 1.05        | 0.86-1.27 |
| Hospital mortality                                                                   | 1.44       | 1.30-1.59 | <b>1.28</b> | 1.13-1.45 | 1.15       | 1.01-1.31 | 1.04        | 0.88-1.23 |
| 28-day mortality                                                                     | 1.48       | 1.34-1.64 | <b>1.34</b> | 1.18-1.52 | 1.14       | 1.00-1.31 | 1.04        | 0.88-1.23 |
| 90-day mortality                                                                     | 1.51       | 1.37-1.66 | <b>1.38</b> | 1.23-1.54 | 1.13       | 1.00-1.28 | 1.03        | 0.89-1.20 |
| 6-month mortality                                                                    | 1.53       | 1.40-1.68 | <b>1.41</b> | 1.27-1.57 | 1.16       | 1.03-1.30 | 1.07        | 0.94-1.24 |
| 1-year mortality                                                                     | 1.53       | 1.40-1.67 | <b>1.40</b> | 1.26-1.56 | 1.14       | 1.02-1.27 | 1.05        | 0.92-1.21 |
| <b>Patients &gt;75 years (n=1624)</b>                                                |            |           |             |           |            |           |             |           |
| ICU mortality                                                                        | 1.12       | 0.99-1.26 | 0.94        | 0.81-1.08 | 0.85       | 0.71-1.01 | <b>0.65</b> | 0.53-0.82 |
| Hospital mortality                                                                   | 1.25       | 1.13-1.39 | 1.10        | 0.97-1.24 | 1.03       | 0.90-1.18 | 0.87        | 0.74-1.03 |
| 28-day mortality                                                                     | 1.23       | 1.11-1.36 | 1.06        | 0.94-1.20 | 1.03       | 0.90-1.18 | 0.87        | 0.73-1.03 |
| 90-day mortality                                                                     | 1.34       | 1.22-1.46 | <b>1.20</b> | 1.08-1.34 | 1.16       | 1.04-1.30 | 1.04        | 0.90-1.20 |
| 6-month mortality                                                                    | 1.34       | 1.23-1.47 | <b>1.22</b> | 1.10-1.35 | 1.19       | 1.07-1.33 | 1.07        | 0.94-1.22 |
| 1-year mortality                                                                     | 1.36       | 1.25-1.48 | <b>1.24</b> | 1.12-1.37 | 1.18       | 1.06-1.31 | 1.05        | 0.92-1.20 |
| *Adjusted for male sex and ANZROD                                                    |            |           |             |           |            |           |             |           |
| CFS - Clinical frailty score, ICD-10mFI - ICD-10 code derived modified frailty index |            |           |             |           |            |           |             |           |

**Supplementary Table 9:** Demographic table describing the dichotomized comparison between frail and non-frail between the modified frailty index (mFI) with and without the ICD-10 code for Hypertension (82.3).

|                                                    | Modified Frailty Index (excluding the ICD-10 code 82.3 for Hypertension) |                 |                  | ICD-10 Modified Frailty Index (including the ICD-10 code 82.3 for Hypertension) |                 |                  |
|----------------------------------------------------|--------------------------------------------------------------------------|-----------------|------------------|---------------------------------------------------------------------------------|-----------------|------------------|
|                                                    | Non-frail                                                                | Frail           | p-value          | Non-frail                                                                       | Frail           | p-value          |
| <b>Number of patients, % (n)</b>                   | 91.2 (6385)                                                              | 8.8 (616)       | -                | 53.6 (5910)                                                                     | 15.6 (1091)     | -                |
| <b>Age (years), mean (SD)</b>                      | 59.9 (18.0)                                                              | 67.3 (11.4)     | <b>&lt;0.001</b> | 59.1 (18.2)                                                                     | 68.3 (11.7)     | <b>&lt;0.001</b> |
| <b>Male, % (n)</b>                                 | 58.3 (3722)                                                              | 72.1 (444)      | <b>&lt;0.001</b> | 57.5 (3397)                                                                     | 70.5 (769)      | <b>&lt;0.001</b> |
| <b>Hospital Admission source, % (n)</b>            |                                                                          |                 |                  |                                                                                 |                 |                  |
| - Private Residence                                | 78.4 (5004)                                                              | 63.8 (393)      | <b>&lt;0.001</b> | 79.2 (4683)                                                                     | 65.4 (714)      | <b>&lt;0.001</b> |
| - Transfer from nursing home                       | 0.3 (17)                                                                 | 0.8 (5)         |                  | 0.2 (14)                                                                        | 0.7 (8)         |                  |
| - Transfer from rehabilitation                     | 20.8 (1330)                                                              | 34.9 (215)      |                  | 20.0 (1183)                                                                     | 33.2 (362)      |                  |
| - From Transitional care program                   | 0.0 (1)                                                                  | 0.1 (1)         |                  | 0.0 (1)                                                                         | 0.1 (1)         |                  |
| - No information                                   | 0.5 (33)                                                                 | 0.3 (2)         |                  | 0.5 (29)                                                                        | 0.5 (6)         |                  |
| <b>Hospital Classification, % (n)</b>              |                                                                          |                 |                  |                                                                                 |                 |                  |
| - Tertiary                                         | 60.9 (3886)                                                              | 71.4 (440)      | <b>&lt;0.001</b> | 60.3 (3562)                                                                     | 70.0 (764)      | <b>&lt;0.001</b> |
| - Metropolitan                                     | 11.3 (723)                                                               | 14.4 (89)       |                  | 11.3 (666)                                                                      | 13.4 (146)      |                  |
| - Rural/Regional                                   | 27.8 (1776)                                                              | 14.1 (87)       |                  | 28.5 (1682)                                                                     | 16.6 (181)      |                  |
| <b>ICU Admission Type, % (n)</b>                   |                                                                          |                 |                  |                                                                                 |                 |                  |
| - Elective Surgery                                 | 24.3 (1554)                                                              | 30.2 (186)      | <b>&lt;0.001</b> | 23.3 (1377)                                                                     | 33.3 (363)      | <b>&lt;0.001</b> |
| - Emergency Surgery                                | 20.8 (1326)                                                              | 14.4 (89)       |                  | 21.1 (1247)                                                                     | 15.4 (168)      |                  |
| - Medical                                          | 54.9 (3505)                                                              | 55.4 (341)      |                  | 55.6 (3286)                                                                     | 51.3 (560)      |                  |
| <b>Comorbidities, % (n)</b>                        |                                                                          |                 |                  |                                                                                 |                 |                  |
| - Chronic respiratory disorder                     | 7.2 (462)                                                                | 12.5 (77)       | <b>&lt;0.001</b> | 7.1 (420)                                                                       | 10.9 (119)      | <b>&lt;0.001</b> |
| - Cardiovascular disorder                          | 6.2 (399)                                                                | 11.5 (71)       | <b>&lt;0.001</b> | 5.9 (350)                                                                       | 11.0 (120)      | <b>&lt;0.001</b> |
| - Chronic renal failure                            | 3.5 (225)                                                                | 5.7 (35)        | <b>0.007</b>     | 3.3 (193)                                                                       | 6.1 (67)        | <b>&lt;0.001</b> |
| - Chronic liver failure /Cirrhosis                 | 2.6 (169)                                                                | 1.9 (12)        | 0.30             | 2.7 (160)                                                                       | 1.9 (21)        | 0.14             |
| - Immunodeficiency                                 | 5.8 (373)                                                                | 3.6 (22)        | <b>0.020</b>     | 6.0 (352)                                                                       | 3.9 (43)        | <b>0.008</b>     |
| - Metastatic cancer                                | 2.8 (176)                                                                | 1.1 (7)         | <b>0.016</b>     | 2.9 (170)                                                                       | 1.2 (13)        | <b>0.001</b>     |
| - Lymphoma                                         | 0.8 (48)                                                                 | 0.6 (4)         | 0.78             | 0.8 (46)                                                                        | 0.5 (6)         | 0.42             |
| - Leukaemia                                        | 1.6 (104)                                                                | 1.1 (7)         | 0.35             | 1.7 (100)                                                                       | 1.0 (11)        | 0.10             |
| Charlson Comorbidity Index                         | 0 (0-1)                                                                  | 2 (1-3)         | <b>&lt;0.001</b> | 0 (0-1)                                                                         | 1 (1-2)         | <b>&lt;0.001</b> |
| Pre-ICU (Hours), median (IQR)                      | 7.3 (3.8-17.4)                                                           | 10.5 (4.4-80.3) | <b>&lt;0.001</b> | 7.1 (3.7-15.9)                                                                  | 10.3 (4.8-73.4) | <b>&lt;0.001</b> |
| ICU admission post MET call                        | 12.2 (780)                                                               | 17.0 (105)      | <b>&lt;0.001</b> | 12.4 (730)                                                                      | 14.2 (885)      | 0.09             |
| Treatment limitations                              | 8.3 (526)                                                                | 13.1 (13.1)     | <b>&lt;0.001</b> | 7.8 (460)                                                                       | 13.5 (147)      | <b>&lt;0.001</b> |
| <b>Scoring and Risk of Death scores, mean (SD)</b> |                                                                          |                 |                  |                                                                                 |                 |                  |
| - APACHE-2 score                                   | 15.1 (7.4)                                                               | 18.6 (7.5)      | <b>&lt;0.001</b> | 14.9 (7.5)                                                                      | 18.0 (7.3)      | <b>&lt;0.001</b> |
| - APACHE-3 score                                   | 50.9 (24.6)                                                              | 62.1 (23.7)     | <b>&lt;0.001</b> | 50.4 (24.8)                                                                     | 60.0 (22.8)     | <b>&lt;0.001</b> |
| - ANZROD (%)                                       | 9.0 (16.6)                                                               | 14.1 (19.0)     | <b>&lt;0.001</b> | 9.0 (17.0)                                                                      | 13.0 (19.0)     | <b>&lt;0.001</b> |
| <b>Organ failure and support, % (n)</b>            |                                                                          |                 |                  |                                                                                 |                 |                  |
| - Invasive ventilation                             | 45.1 (2877)                                                              | 63.1 (389)      | <b>&lt;0.001</b> | 44.0 (2600)                                                                     | 61.0 (666)      | <b>&lt;0.001</b> |
| - Renal replacement therapy                        | 6.0 (386)                                                                | 14.3 (88)       | <b>&lt;0.001</b> | 5.9 (347)                                                                       | 11.6 (127)      | <b>&lt;0.001</b> |
| <b>Mortality, % (n)</b>                            |                                                                          |                 |                  |                                                                                 |                 |                  |
| - ICU Mortality                                    | 6.5 (413)                                                                | 9.6 (59)        | <b>0.003</b>     | 6.5 (382)                                                                       | 8.2 (90)        | <b>&lt;0.001</b> |
| - Hospital Mortality                               | 8.7 (554)                                                                | 14.3 (88)       | <b>&lt;0.001</b> | 8.5 (505)                                                                       | 12.6 (137)      | <b>&lt;0.001</b> |
| - 1-year Mortality                                 | 13.6 (866)                                                               | 22.6 (139)      | <b>&lt;0.001</b> | 13.3 (788)                                                                      | 19.9 (217)      | <b>&lt;0.001</b> |
| <b>Length of Stay, median (IQR)</b>                |                                                                          |                 |                  |                                                                                 |                 |                  |
| - ICU length of stay (days)                        | 1.8 (1.0-3.5)                                                            | 2.8 (1.3-5.1)   | <b>&lt;0.001</b> | 1.9 (1.0-3.4)                                                                   | 2.4 (1.3-4.3)   | <b>&lt;0.001</b> |

|                                     |             |            |        |             |            |              |
|-------------------------------------|-------------|------------|--------|-------------|------------|--------------|
| - Hospital length of stay (days)    | 7 (4-14)    | 12 (7-20)  | <0.001 | 7 (4-15)    | 11 (6-17)  | <0.001       |
| <b>Discharge Destination, % (n)</b> |             |            |        |             |            |              |
| - Usual residence                   | 65.1 (4154) | 55.5 (342) | <0.001 | 65.2 (3852) | 59.0 (644) | <b>0.015</b> |
| - Nursing home discharge            | 1.5 (93)    | 2.8 (17)   |        | 1.4 (82)    | 2.6 (28)   |              |

SD = standard deviation; *n* = number; *ICU* = intensive care unit; APACHE = Acute Physiology and Chronic Health Evaluation; ANZROD = Australia New Zealand risk-of-death

Respiratory disorders: Chronic restrictive, obstructive disease resulting in severe exercise restriction (unable to climb stairs or perform household duties); or documented chronic hypoxia, hypercapnia, secondary polycythemia, severe pulmonary hypertension (mean > 40 mmHg); or ventilator dependency.

**Cardiovascular:** New York Heart Association Class IV: angina or symptoms at rest or on minimal exertion

**Liver:** *Biopsy proven* cirrhosis and documented portal hypertension, or episodes of past upper GI bleeding attributed to portal hypertension.

**Renal:** Must be receiving chronic hemodialysis or peritoneal dialysis.

**Immune Suppressive Disease (Immune disease):** Condition that is sufficiently advanced to suppress resistance to infection: Leukaemia, AIDS, lymphoma, severe autoimmune disease or documented diffuse metastatic cancer.

**Immunosuppressive Therapy (Immunosuppressed):** The patient has received therapy that has suppressed resistance to infection: e.g., immunosuppression, chemotherapy within 4 weeks of admission, radiation, high-dose steroid treatment (e.g., >1.5mg/kg methylprednisolone or equivalent for ≥5 days), long term treatment with >20 mg/day steroid.

**Supplementary Table 10:** Association between the Clinical Frailty Scale (CFS) and the ICD-10 modified frailty index (mFI) including the ICD-10 code 82.3 for Hypertension.

| mFI                                    | CFS score          |                | Spearman's Correlation <sup>(1)</sup>     | Agreement <sup>(2)</sup>  |
|----------------------------------------|--------------------|----------------|-------------------------------------------|---------------------------|
|                                        | non-frail (CFS <5) | Frail (CFS ≥5) | Correlation coefficient (95%-CI; p-value) | Kappa (95%-CI*; p-value)  |
| <b>All patients (n=7001)</b>           | <b>5678</b>        | <b>1323</b>    |                                           |                           |
| ICD-10 mFI (non-frail; n=5910 [73.8%]) | 4860               | 1050           | 0.25 (0.23-0.28; p<0.001)                 | 0.07 (0.04-0.09; p<0.001) |
| ICD-10mFI (frail; n=1091 [26.2%])      | 818                | 273            |                                           |                           |
| ICD-10mFI with CCI                     |                    |                | 0.29 (0.27-0.31; p<0.001)                 | 0.07 (0.02-0.11; p<0.001) |
| CFS with CCI                           |                    |                | 0.25 (0.23-0.27; p<0.001)                 | 0.06 (0.02-0.09; p<0.001) |

CFS – Clinical Frailty Scale; ICD-10mFI – ICD-10 code derived modified frailty index; CCI – Charlson comorbidity index  
<sup>(1)</sup> Spearman correlation based on continuous variables  
<sup>(2)</sup> Kappa agreement based on dichotomous variables

**Supplementary Table 11:** Cox Proportional Hazards Regression Analysis, for 6-month survival, adjusted for sex, and ANZROD with and without 82.3 ICD-10 code for hypertension.

|                                                                                                           | <b>Unadjusted</b>  | <b>Adjusted</b>         |
|-----------------------------------------------------------------------------------------------------------|--------------------|-------------------------|
|                                                                                                           | <b>HR (95%-CI)</b> | <b>HR (95%-CI)</b>      |
| <b>CFS</b>                                                                                                | 1.44 (1.38-1.49)   | <b>1.26</b> (1.21-1.31) |
| <b>ICD-10mFI (excluding the ICD-10 code 82.3 for Hypertension)</b>                                        | 1.25 (1.18-1.32)   | 1.04 (0.98-1.10)        |
| <b>ICD-10mFI (including the ICD-10 code 82.3 for Hypertension)</b>                                        | 1.22 (1.16-1.28)   | 1.03 (0.98-1.09)        |
| HR - Hazard ratio; CFS - Clinical frailty scale; mFI - modified frailty index; ANZROD – ANZ Risk of death |                    |                         |

**Supplementary Table 12:** Comparison of ICD-10 modified Frailty Index (ICD-10mFI) with and without 82.3 ICD-10 code for hypertension.

|                                                                                     | Outcome   | Discrimination, C-statistic (95%-CI)*                                |                                                                   |
|-------------------------------------------------------------------------------------|-----------|----------------------------------------------------------------------|-------------------------------------------------------------------|
|                                                                                     |           | ICD-10mFI<br>(excluding the ICD-10<br>code 82.3 for<br>Hypertension) | ICD-10mFI (including<br>the ICD-10 code 82.3<br>for Hypertension) |
| - ICU mortality                                                                     | 472/6994  | 0.54 (0.52-0.57)                                                     | 0.54 (0.52-0.57)                                                  |
| - Hospital mortality                                                                | 642/7000  | 0.56 (0.54-0.58)                                                     | 0.56 (0.53-0.58)                                                  |
| - 28-day mortality                                                                  | 630/7001  | 0.56 (0.54-0.59)                                                     | 0.56 (0.54-0.58)                                                  |
| - 90-day mortality                                                                  | 828/7001  | 0.57 (0.55-0.59)                                                     | 0.57 (0.55-0.59)                                                  |
| - 6-month mortality                                                                 | 944/7001  | 0.58 (0.56-0.60)                                                     | 0.58 (0.56-0.60)                                                  |
| - 1-year mortality                                                                  | 1005/7001 | 0.58 (0.56-0.60)                                                     | 0.58 (0.56-0.60)                                                  |
| * Unadjusted<br>ICU – intensive care unit, ICD-10mFI – ICD-10 code derived modified |           |                                                                      |                                                                   |

**Supplementary Table 13:** Association between the CFS and the ICD-10-mFI for all patients and subgroups stratified by age.

| ICD-10mFI                                                                                                         | Spearman's Correlation <sup>(1)</sup> | Agreement <sup>(2)</sup> |
|-------------------------------------------------------------------------------------------------------------------|---------------------------------------|--------------------------|
|                                                                                                                   | Correlation coefficient (95%-CI)      | Kappa (95%-CI*)          |
| <b>Age-stratified Subgroup Analysis</b>                                                                           |                                       |                          |
| <b>Patients &lt;65 years (n=3642)</b>                                                                             |                                       |                          |
| - ICD-10mFI with CFS                                                                                              | 0.13 (0.09, 0.16)                     | -0.11 (-0.12, -0.10)     |
| - ICD-10mFI with CCI                                                                                              | 0.14 (0.11, 0.17)                     | 0.12 (0.11, 0.13)        |
| - CFS with CCI                                                                                                    | 0.27 (0.23, 0.30)                     | -0.15 (-0.16, -0.14)     |
| <b>Patients 65-75 years (n=1735)</b>                                                                              |                                       |                          |
| - ICD-10mFI with CFS                                                                                              | 0.23 (0.20, 0.25)                     | -0.11 (-0.12, -0.10)     |
| - ICD-10mFI with CCI                                                                                              | 0.31 (0.25, 0.34)                     | 0.12 (0.11, 0.13)        |
| - CFS with CCI                                                                                                    | 0.27 (0.25, 0.30)                     | -0.15 (-0.16, -0.14)     |
| <b>Patients &gt;75 years (n=1624)</b>                                                                             |                                       |                          |
| - ICD-10 mFI with CFS                                                                                             | 0.11 (0.06, 0.16)                     | -0.11 (-0.12, -0.10)     |
| - ICD-10mFI with CCI                                                                                              | 0.27 (0.22, 0.31)                     | 0.12 (0.11, 0.13)        |
| - CFS with CCI                                                                                                    | 0.12 (0.07, 0.17)                     | -0.15 (-0.16, -0.14)     |
| CFS – Clinical Frailty Scale; ICD-10mFI – ICD-10 derived modified frailty index; CCI - Charlson comorbidity index |                                       |                          |
| <sup>(1)</sup> Spearman correlation based on continuous variables                                                 |                                       |                          |
| <sup>(2)</sup> Kappa agreement based on dichotomous variables                                                     |                                       |                          |

**Supplementary Table 14:** Cox Proportional Hazards Regression Analysis, for 6-month survival, adjusted for ANZROD and sex, for subgroups stratified by age.

| Covariates                                                                                                | Unadjusted       | Adjusted                |
|-----------------------------------------------------------------------------------------------------------|------------------|-------------------------|
|                                                                                                           | HR (95%-CI)      | HR (95%-CI)             |
| <b>Patients &lt;65 years (n=3642)</b>                                                                     |                  |                         |
| <b>CFS</b>                                                                                                | 1.38 (1.30-1.48) | <b>1.26</b> (1.18-1.35) |
| <b>Male sex</b>                                                                                           | -                | 0.76 (0.61-0.96)        |
| <b>ANZROD</b>                                                                                             | -                | 1.05 (1.05-1.06)        |
| <b>ICD-10mFI</b>                                                                                          | 1.30 (1.18-1.44) | 1.03 (0.93-1.15)        |
| <b>Male sex</b>                                                                                           | -                | 0.82 (0.65-1.03)        |
| <b>ANZROD</b>                                                                                             | -                | 1.05 (1.05-1.06)        |
| <b>Patients 65-75 years (n=1735)</b>                                                                      |                  |                         |
| <b>CFS</b>                                                                                                | 1.46 (1.36-1.58) | <b>1.25</b> (1.19-1.31) |
| <b>Male sex</b>                                                                                           | -                | 0.83 (0.71-0.97)        |
| <b>ANZROD</b>                                                                                             | -                | 1.05 (1.05-1.05)        |
| <b>ICD-10mFI</b>                                                                                          | 1.13 (1.02-1.16) | 1.05 (0.95-1.17)        |
| <b>Male sex</b>                                                                                           | -                | 1.16 (0.90-1.49)        |
| <b>ANZROD</b>                                                                                             | -                | 1.05 (1.04-1.05)        |
| <b>Patients &gt;75 years (n=1624)</b>                                                                     |                  |                         |
| <b>CFS</b>                                                                                                | 1.30 (1.21-1.40) | <b>1.17</b> (1.08-1.26) |
| <b>Male sex</b>                                                                                           | -                | 0.92 (0.74-1.14)        |
| <b>ANZROD</b>                                                                                             | -                | 1.04 (1.04-1.05)        |
| <b>ICD-10mFI</b>                                                                                          | 1.15 (1.05-1.26) | 0.96 (0.87-1.06)        |
| <b>Male sex</b>                                                                                           | -                | 0.97 (0.78-1.20)        |
| <b>ANZROD</b>                                                                                             | -                | 1.04 (1.04-1.05)        |
| HR - Hazard ratio; CFS - Clinical frailty scale; mFI - modified frailty index; ANZROD – ANZ Risk of death |                  |                         |



**Supplemental Table 15:** Comparison of Clinical Frailty Scale (CFS) and ICD-10-modified Frailty Index (mFI) for predicting clinical outcomes, for subgroups stratified by age.

| Outcomes                                                                                                                                                                                                                                  | Raw mortality (n/N) <sup>#</sup> | Discrimination, C-statistic (95%-CI) * |                  |                  | Adjusted Discrimination, C-statistic (95%-CI) ** |                  |         |
|-------------------------------------------------------------------------------------------------------------------------------------------------------------------------------------------------------------------------------------------|----------------------------------|----------------------------------------|------------------|------------------|--------------------------------------------------|------------------|---------|
|                                                                                                                                                                                                                                           |                                  | CFS                                    | ICD-10mFI        | p-value          | CFS                                              | ICD-10mFI        | p-value |
| <b>Patients &lt;65 years (n=3642)</b>                                                                                                                                                                                                     |                                  |                                        |                  |                  |                                                  |                  |         |
| ICU mortality                                                                                                                                                                                                                             | 195/3638                         | 0.59 (0.55-0.63)                       | 0.57 (0.53-0.61) | 0.59             | 0.94 (0.92-0.95)                                 | 0.93 (0.92-0.95) | 0.53    |
| Hospital mortality                                                                                                                                                                                                                        | 238/3642                         | 0.60 (0.56-0.64)                       | 0.58 (0.54-0.62) | 0.33             | 0.92 (0.90-0.94)                                 | 0.92 (0.90-0.94) | 0.19    |
| 28-day mortality                                                                                                                                                                                                                          | 227/3642                         | 0.61 (0.57-0.65)                       | 0.58 (0.55-0.62) | 0.33             | 0.92 (0.91-0.94)                                 | 0.92 (0.90-0.94) | 0.43    |
| 90-day mortality                                                                                                                                                                                                                          | 293/3642                         | 0.63 (0.60-0.66)                       | 0.58 (0.54-0.61) | <b>0.011</b>     | 0.90 (0.88-0.92)                                 | 0.89 (0.87-0.91) | 0.13    |
| 6-month mortality                                                                                                                                                                                                                         | 327/3642                         | 0.65 (0.62-0.68)                       | 0.58 (0.55-0.61) | <b>0.001</b>     | 0.89 (0.87-0.91)                                 | 0.88 (0.86-0.90) | 0.15    |
| 1-year mortality                                                                                                                                                                                                                          | 351/3642                         | 0.65 (0.62-0.68)                       | 0.59 (0.56-0.62) | <b>0.002</b>     | 0.89 (0.87-0.90)                                 | 0.88 (0.86-0.90) | 0.08    |
| <b>Patients 65-75 years (n=1735)</b>                                                                                                                                                                                                      |                                  |                                        |                  |                  |                                                  |                  |         |
| ICU mortality                                                                                                                                                                                                                             | 138/1734                         | 0.63 (0.58-0.68)                       | 0.55 (0.50-0.60) | <b>0.012</b>     | 0.91 (0.88-0.94)                                 | 0.91 (0.89-0.93) | 0.21    |
| Hospital mortality                                                                                                                                                                                                                        | 189/1735                         | 0.64 (0.59-0.68)                       | 0.54 (0.50-0.59) | <b>0.002</b>     | 0.89 (0.86-0.92)                                 | 0.89 (0.86-0.92) | 0.58    |
| 28-day mortality                                                                                                                                                                                                                          | 187/1735                         | 0.65 (0.60-0.69)                       | 0.54 (0.50-0.59) | <b>&lt;0.001</b> | 0.88 (0.85-0.91)                                 | 0.89 (0.86-0.92) | 0.41    |
| 90-day mortality                                                                                                                                                                                                                          | 232/1735                         | 0.65 (0.61-0.69)                       | 0.54 (0.50-0.58) | <b>&lt;0.001</b> | 0.87 (0.84-0.89)                                 | 0.88 (0.85-0.90) | 0.19    |
| 6-month mortality                                                                                                                                                                                                                         | 271/1735                         | 0.66 (0.62-0.69)                       | 0.54 (0.51-0.58) | <b>&lt;0.001</b> | 0.86 (0.84-0.89)                                 | 0.86 (0.84-0.89) | 0.87    |
| 1-year mortality                                                                                                                                                                                                                          | 287/1735                         | 0.67 (0.64-0.69)                       | 0.59 (0.57-0.61) | <b>&lt;0.001</b> | 0.86 (0.83-0.88)                                 | 0.86 (0.83-0.88) | 0.90    |
| <b>Patients &gt;75 years (n=1624)</b>                                                                                                                                                                                                     |                                  |                                        |                  |                  |                                                  |                  |         |
| ICU mortality                                                                                                                                                                                                                             | 139/1622                         | 0.54 (0.48-0.59)                       | 0.46 (0.41-0.51) | <b>0.023</b>     | 0.90 (0.87-0.92)                                 | 0.90 (0.85-0.92) | 0.49    |
| Hospital mortality                                                                                                                                                                                                                        | 215/1623                         | 0.58 (0.53-0.62)                       | 0.52 (0.47-0.56) | <b>0.028</b>     | 0.88 (0.86-0.90)                                 | 0.87 (0.85-0.90) | 0.31    |
| 28-day mortality                                                                                                                                                                                                                          | 216/1624                         | 0.57 (0.53-0.61)                       | 0.51 (0.47-0.56) | <b>0.041</b>     | 0.88 (0.86-0.90)                                 | 0.88 (0.85-0.90) | 0.61    |
| 90-day mortality                                                                                                                                                                                                                          | 302/1624                         | 0.60 (0.57-0.64)                       | 0.55 (0.51-0.58) | <b>0.016</b>     | 0.86 (0.84-0.88)                                 | 0.86 (0.84-0.88) | 0.48    |
| 6-month mortality                                                                                                                                                                                                                         | 345/1624                         | 0.61 (0.57-0.64)                       | 0.56 (0.52-0.59) | <b>0.021</b>     | 0.85 (0.83-0.87)                                 | 0.85 (0.83-0.88) | 0.44    |
| 1-year mortality                                                                                                                                                                                                                          | 366/1624                         | 0.61 (0.58-0.64)                       | 0.55 (0.52-0.59) | <b>0.008</b>     | 0.84 (0.82-0.86)                                 | 0.84 (0.82-0.87) | 0.82    |
| <sup>#</sup> Outcome based on CFS<br><sup>*</sup> Unadjusted<br><sup>**</sup> Adjusted for ANZROD and male sex using logistic regression models<br>CFS - Clinical frailty scale; mFI - modified frailty index; ANZROD – ANZ Risk of death |                                  |                                        |                  |                  |                                                  |                  |         |

**Supplementary Table 16:** Differences between CFS vs. HFRS and CFS vs. ICD-10-mFI studies to demonstrate how this current paper enhances knowledge and provides insight on how the clinicians should do when it comes to estimating frailty using administrative data.

| Key elements                                                      | CFS vs. HFRS paper*                                                                                                                                                                                                                                                                                                                                                                                                                                                                                                                                                                                                      | CFS vs. ICD-10mFI paper                                                                                                                                                                                                                             | Inference/Implication                                                                                                                                                    |           |               |      |      |                    |      |      |                  |      |      |                  |      |      |                   |      |      |                  |      |      |                                                                                                                                                                                                                                                                                                                                                                                                                                                                                                                                                                                                                                      |                   |          |                 |               |      |      |                    |      |      |                  |      |      |                  |      |      |                   |      |      |                  |      |      |                                                                                                                                                                                                                                                                                                                                                                                                           |
|-------------------------------------------------------------------|--------------------------------------------------------------------------------------------------------------------------------------------------------------------------------------------------------------------------------------------------------------------------------------------------------------------------------------------------------------------------------------------------------------------------------------------------------------------------------------------------------------------------------------------------------------------------------------------------------------------------|-----------------------------------------------------------------------------------------------------------------------------------------------------------------------------------------------------------------------------------------------------|--------------------------------------------------------------------------------------------------------------------------------------------------------------------------|-----------|---------------|------|------|--------------------|------|------|------------------|------|------|------------------|------|------|-------------------|------|------|------------------|------|------|--------------------------------------------------------------------------------------------------------------------------------------------------------------------------------------------------------------------------------------------------------------------------------------------------------------------------------------------------------------------------------------------------------------------------------------------------------------------------------------------------------------------------------------------------------------------------------------------------------------------------------------|-------------------|----------|-----------------|---------------|------|------|--------------------|------|------|------------------|------|------|------------------|------|------|-------------------|------|------|------------------|------|------|-----------------------------------------------------------------------------------------------------------------------------------------------------------------------------------------------------------------------------------------------------------------------------------------------------------------------------------------------------------------------------------------------------------|
| <b>1. Dataset</b>                                                 | Both studies used the same dataset of patients admitted to 16 Australian ICUs in the state of Victoria between 1 <sup>st</sup> April 2017 to 30 <sup>th</sup> June 2018.                                                                                                                                                                                                                                                                                                                                                                                                                                                 |                                                                                                                                                                                                                                                     | -                                                                                                                                                                        |           |               |      |      |                    |      |      |                  |      |      |                  |      |      |                   |      |      |                  |      |      |                                                                                                                                                                                                                                                                                                                                                                                                                                                                                                                                                                                                                                      |                   |          |                 |               |      |      |                    |      |      |                  |      |      |                  |      |      |                   |      |      |                  |      |      |                                                                                                                                                                                                                                                                                                                                                                                                           |
| <b>2. Frailty measurement</b>                                     | Although the original HFRS used a combination of pre-existing conditions and those that developed during the hospitalisation, for the purposes of the study, we only used the ICD-10 codes that represented pre-existing conditions at the time of index hospital admission.                                                                                                                                                                                                                                                                                                                                             | The ICD-10mFI was calculated as an approximation using all the pertinent ICD-10 codes, from prior and the new conditions accrued from indexed hospitalization, required to identify the eleven variables using the Delphi consensus investigation** | There is a difference in how the ICD-10-mFI is estimated.                                                                                                                |           |               |      |      |                    |      |      |                  |      |      |                  |      |      |                   |      |      |                  |      |      |                                                                                                                                                                                                                                                                                                                                                                                                                                                                                                                                                                                                                                      |                   |          |                 |               |      |      |                    |      |      |                  |      |      |                  |      |      |                   |      |      |                  |      |      |                                                                                                                                                                                                                                                                                                                                                                                                           |
| <b>3. Correlation with CFS (Spearman's rho)</b>                   | rho= <b>0.13</b> (95%CI: 0.10-0.15)                                                                                                                                                                                                                                                                                                                                                                                                                                                                                                                                                                                      | rho= <b>0.22</b> (95%-CI: 0.19-0.24).                                                                                                                                                                                                               | Although both are weak, ICD-10-mFI correlation with CFS is marginally better than HFRS with CFS.                                                                         |           |               |      |      |                    |      |      |                  |      |      |                  |      |      |                   |      |      |                  |      |      |                                                                                                                                                                                                                                                                                                                                                                                                                                                                                                                                                                                                                                      |                   |          |                 |               |      |      |                    |      |      |                  |      |      |                  |      |      |                   |      |      |                  |      |      |                                                                                                                                                                                                                                                                                                                                                                                                           |
| <b>4. Agreement (Kappa)</b>                                       | $\kappa$ = <b>0.12</b> (95%CI: 0.10-0.15)                                                                                                                                                                                                                                                                                                                                                                                                                                                                                                                                                                                | $\kappa$ = <b>0.06</b> (95%CI: 0.04-0.08)                                                                                                                                                                                                           | Both had weak agreements with CFS.                                                                                                                                       |           |               |      |      |                    |      |      |                  |      |      |                  |      |      |                   |      |      |                  |      |      |                                                                                                                                                                                                                                                                                                                                                                                                                                                                                                                                                                                                                                      |                   |          |                 |               |      |      |                    |      |      |                  |      |      |                  |      |      |                   |      |      |                  |      |      |                                                                                                                                                                                                                                                                                                                                                                                                           |
| <b>5. Cox Proportional Hazards Regression analysis</b>            | 1-year (5-unit increment)<br>HR= <b>1.08</b> (95%CI: 1.02-1.15)                                                                                                                                                                                                                                                                                                                                                                                                                                                                                                                                                          | 6-months (1-unit increment)<br>HR= <b>1.03</b> (95%CI: 0.93-1.15)                                                                                                                                                                                   | ICD-10-mFI did not predict long-term survival, whereas HFRS did.                                                                                                         |           |               |      |      |                    |      |      |                  |      |      |                  |      |      |                   |      |      |                  |      |      |                                                                                                                                                                                                                                                                                                                                                                                                                                                                                                                                                                                                                                      |                   |          |                 |               |      |      |                    |      |      |                  |      |      |                  |      |      |                   |      |      |                  |      |      |                                                                                                                                                                                                                                                                                                                                                                                                           |
| <b>6. C-static discrimination of long-term mortality (1-year)</b> | CFS had a better discrimination than HFRS (AUROC 0.66 vs 0.63 p<0.0001).                                                                                                                                                                                                                                                                                                                                                                                                                                                                                                                                                 | CFS had a better discrimination than HFRS (AUROC 0.66 vs 0.58 p<0.0001).                                                                                                                                                                            | However, after multivariable adjustment, none of the 3 frailty measures were able to improve the discrimination provided by patient illness severity assessed by ANZROD. |           |               |      |      |                    |      |      |                  |      |      |                  |      |      |                   |      |      |                  |      |      |                                                                                                                                                                                                                                                                                                                                                                                                                                                                                                                                                                                                                                      |                   |          |                 |               |      |      |                    |      |      |                  |      |      |                  |      |      |                   |      |      |                  |      |      |                                                                                                                                                                                                                                                                                                                                                                                                           |
| <b>7. Multivariable logistic regression (odds ratio)</b>          | <table border="1"> <caption>Approximate Odds Ratios from Forest Plot (CFS vs HFRS)</caption> <thead> <tr> <th>Mortality Outcome</th> <th>CFS (OR)</th> <th>HFRS (OR)</th> </tr> </thead> <tbody> <tr> <td>ICU Mortality</td> <td>1.10</td> <td>0.98</td> </tr> <tr> <td>Hospital Mortality</td> <td>1.22</td> <td>1.12</td> </tr> <tr> <td>28-day Mortality</td> <td>1.25</td> <td>1.10</td> </tr> <tr> <td>90-day Mortality</td> <td>1.35</td> <td>1.15</td> </tr> <tr> <td>6-month Mortality</td> <td>1.38</td> <td>1.12</td> </tr> <tr> <td>1-year Mortality</td> <td>1.38</td> <td>1.12</td> </tr> </tbody> </table> | Mortality Outcome                                                                                                                                                                                                                                   | CFS (OR)                                                                                                                                                                 | HFRS (OR) | ICU Mortality | 1.10 | 0.98 | Hospital Mortality | 1.22 | 1.12 | 28-day Mortality | 1.25 | 1.10 | 90-day Mortality | 1.35 | 1.15 | 6-month Mortality | 1.38 | 1.12 | 1-year Mortality | 1.38 | 1.12 | <table border="1"> <caption>Approximate Odds Ratios from Forest Plot (CFS vs ICD-10 mFI)</caption> <thead> <tr> <th>Mortality Outcome</th> <th>CFS (OR)</th> <th>ICD-10 mFI (OR)</th> </tr> </thead> <tbody> <tr> <td>ICU Mortality</td> <td>1.10</td> <td>0.90</td> </tr> <tr> <td>Hospital Mortality</td> <td>1.22</td> <td>1.02</td> </tr> <tr> <td>28-day Mortality</td> <td>1.25</td> <td>1.02</td> </tr> <tr> <td>90-day Mortality</td> <td>1.35</td> <td>1.08</td> </tr> <tr> <td>6-month Mortality</td> <td>1.38</td> <td>1.12</td> </tr> <tr> <td>1-year Mortality</td> <td>1.38</td> <td>1.12</td> </tr> </tbody> </table> | Mortality Outcome | CFS (OR) | ICD-10 mFI (OR) | ICU Mortality | 1.10 | 0.90 | Hospital Mortality | 1.22 | 1.02 | 28-day Mortality | 1.25 | 1.02 | 90-day Mortality | 1.35 | 1.08 | 6-month Mortality | 1.38 | 1.12 | 1-year Mortality | 1.38 | 1.12 | The multivariable logistic regression, adjusted for ANZROD and sex, demonstrated that the HFRS was independently predictive of only 90-day 6-month and 1-year mortalities. In contrast, ICD-10-mFI were only independently predictive of only long-term (6-month and 1-year) mortalities. With both administrative measures, the magnitude of predictions was considerably lower than the CFS prediction. |
| Mortality Outcome                                                 | CFS (OR)                                                                                                                                                                                                                                                                                                                                                                                                                                                                                                                                                                                                                 | HFRS (OR)                                                                                                                                                                                                                                           |                                                                                                                                                                          |           |               |      |      |                    |      |      |                  |      |      |                  |      |      |                   |      |      |                  |      |      |                                                                                                                                                                                                                                                                                                                                                                                                                                                                                                                                                                                                                                      |                   |          |                 |               |      |      |                    |      |      |                  |      |      |                  |      |      |                   |      |      |                  |      |      |                                                                                                                                                                                                                                                                                                                                                                                                           |
| ICU Mortality                                                     | 1.10                                                                                                                                                                                                                                                                                                                                                                                                                                                                                                                                                                                                                     | 0.98                                                                                                                                                                                                                                                |                                                                                                                                                                          |           |               |      |      |                    |      |      |                  |      |      |                  |      |      |                   |      |      |                  |      |      |                                                                                                                                                                                                                                                                                                                                                                                                                                                                                                                                                                                                                                      |                   |          |                 |               |      |      |                    |      |      |                  |      |      |                  |      |      |                   |      |      |                  |      |      |                                                                                                                                                                                                                                                                                                                                                                                                           |
| Hospital Mortality                                                | 1.22                                                                                                                                                                                                                                                                                                                                                                                                                                                                                                                                                                                                                     | 1.12                                                                                                                                                                                                                                                |                                                                                                                                                                          |           |               |      |      |                    |      |      |                  |      |      |                  |      |      |                   |      |      |                  |      |      |                                                                                                                                                                                                                                                                                                                                                                                                                                                                                                                                                                                                                                      |                   |          |                 |               |      |      |                    |      |      |                  |      |      |                  |      |      |                   |      |      |                  |      |      |                                                                                                                                                                                                                                                                                                                                                                                                           |
| 28-day Mortality                                                  | 1.25                                                                                                                                                                                                                                                                                                                                                                                                                                                                                                                                                                                                                     | 1.10                                                                                                                                                                                                                                                |                                                                                                                                                                          |           |               |      |      |                    |      |      |                  |      |      |                  |      |      |                   |      |      |                  |      |      |                                                                                                                                                                                                                                                                                                                                                                                                                                                                                                                                                                                                                                      |                   |          |                 |               |      |      |                    |      |      |                  |      |      |                  |      |      |                   |      |      |                  |      |      |                                                                                                                                                                                                                                                                                                                                                                                                           |
| 90-day Mortality                                                  | 1.35                                                                                                                                                                                                                                                                                                                                                                                                                                                                                                                                                                                                                     | 1.15                                                                                                                                                                                                                                                |                                                                                                                                                                          |           |               |      |      |                    |      |      |                  |      |      |                  |      |      |                   |      |      |                  |      |      |                                                                                                                                                                                                                                                                                                                                                                                                                                                                                                                                                                                                                                      |                   |          |                 |               |      |      |                    |      |      |                  |      |      |                  |      |      |                   |      |      |                  |      |      |                                                                                                                                                                                                                                                                                                                                                                                                           |
| 6-month Mortality                                                 | 1.38                                                                                                                                                                                                                                                                                                                                                                                                                                                                                                                                                                                                                     | 1.12                                                                                                                                                                                                                                                |                                                                                                                                                                          |           |               |      |      |                    |      |      |                  |      |      |                  |      |      |                   |      |      |                  |      |      |                                                                                                                                                                                                                                                                                                                                                                                                                                                                                                                                                                                                                                      |                   |          |                 |               |      |      |                    |      |      |                  |      |      |                  |      |      |                   |      |      |                  |      |      |                                                                                                                                                                                                                                                                                                                                                                                                           |
| 1-year Mortality                                                  | 1.38                                                                                                                                                                                                                                                                                                                                                                                                                                                                                                                                                                                                                     | 1.12                                                                                                                                                                                                                                                |                                                                                                                                                                          |           |               |      |      |                    |      |      |                  |      |      |                  |      |      |                   |      |      |                  |      |      |                                                                                                                                                                                                                                                                                                                                                                                                                                                                                                                                                                                                                                      |                   |          |                 |               |      |      |                    |      |      |                  |      |      |                  |      |      |                   |      |      |                  |      |      |                                                                                                                                                                                                                                                                                                                                                                                                           |
| Mortality Outcome                                                 | CFS (OR)                                                                                                                                                                                                                                                                                                                                                                                                                                                                                                                                                                                                                 | ICD-10 mFI (OR)                                                                                                                                                                                                                                     |                                                                                                                                                                          |           |               |      |      |                    |      |      |                  |      |      |                  |      |      |                   |      |      |                  |      |      |                                                                                                                                                                                                                                                                                                                                                                                                                                                                                                                                                                                                                                      |                   |          |                 |               |      |      |                    |      |      |                  |      |      |                  |      |      |                   |      |      |                  |      |      |                                                                                                                                                                                                                                                                                                                                                                                                           |
| ICU Mortality                                                     | 1.10                                                                                                                                                                                                                                                                                                                                                                                                                                                                                                                                                                                                                     | 0.90                                                                                                                                                                                                                                                |                                                                                                                                                                          |           |               |      |      |                    |      |      |                  |      |      |                  |      |      |                   |      |      |                  |      |      |                                                                                                                                                                                                                                                                                                                                                                                                                                                                                                                                                                                                                                      |                   |          |                 |               |      |      |                    |      |      |                  |      |      |                  |      |      |                   |      |      |                  |      |      |                                                                                                                                                                                                                                                                                                                                                                                                           |
| Hospital Mortality                                                | 1.22                                                                                                                                                                                                                                                                                                                                                                                                                                                                                                                                                                                                                     | 1.02                                                                                                                                                                                                                                                |                                                                                                                                                                          |           |               |      |      |                    |      |      |                  |      |      |                  |      |      |                   |      |      |                  |      |      |                                                                                                                                                                                                                                                                                                                                                                                                                                                                                                                                                                                                                                      |                   |          |                 |               |      |      |                    |      |      |                  |      |      |                  |      |      |                   |      |      |                  |      |      |                                                                                                                                                                                                                                                                                                                                                                                                           |
| 28-day Mortality                                                  | 1.25                                                                                                                                                                                                                                                                                                                                                                                                                                                                                                                                                                                                                     | 1.02                                                                                                                                                                                                                                                |                                                                                                                                                                          |           |               |      |      |                    |      |      |                  |      |      |                  |      |      |                   |      |      |                  |      |      |                                                                                                                                                                                                                                                                                                                                                                                                                                                                                                                                                                                                                                      |                   |          |                 |               |      |      |                    |      |      |                  |      |      |                  |      |      |                   |      |      |                  |      |      |                                                                                                                                                                                                                                                                                                                                                                                                           |
| 90-day Mortality                                                  | 1.35                                                                                                                                                                                                                                                                                                                                                                                                                                                                                                                                                                                                                     | 1.08                                                                                                                                                                                                                                                |                                                                                                                                                                          |           |               |      |      |                    |      |      |                  |      |      |                  |      |      |                   |      |      |                  |      |      |                                                                                                                                                                                                                                                                                                                                                                                                                                                                                                                                                                                                                                      |                   |          |                 |               |      |      |                    |      |      |                  |      |      |                  |      |      |                   |      |      |                  |      |      |                                                                                                                                                                                                                                                                                                                                                                                                           |
| 6-month Mortality                                                 | 1.38                                                                                                                                                                                                                                                                                                                                                                                                                                                                                                                                                                                                                     | 1.12                                                                                                                                                                                                                                                |                                                                                                                                                                          |           |               |      |      |                    |      |      |                  |      |      |                  |      |      |                   |      |      |                  |      |      |                                                                                                                                                                                                                                                                                                                                                                                                                                                                                                                                                                                                                                      |                   |          |                 |               |      |      |                    |      |      |                  |      |      |                  |      |      |                   |      |      |                  |      |      |                                                                                                                                                                                                                                                                                                                                                                                                           |
| 1-year Mortality                                                  | 1.38                                                                                                                                                                                                                                                                                                                                                                                                                                                                                                                                                                                                                     | 1.12                                                                                                                                                                                                                                                |                                                                                                                                                                          |           |               |      |      |                    |      |      |                  |      |      |                  |      |      |                   |      |      |                  |      |      |                                                                                                                                                                                                                                                                                                                                                                                                                                                                                                                                                                                                                                      |                   |          |                 |               |      |      |                    |      |      |                  |      |      |                  |      |      |                   |      |      |                  |      |      |                                                                                                                                                                                                                                                                                                                                                                                                           |

|                                                                                                                                                                                                                                                                                                                                                                                                                                                                                                                                                                                                                                                                                                                                                                                                    |                                                                                                                                                                                                                                                                                                                                                                                                                                                                                                                                                                                                                                                                                                                                                                                                                 |                                                                                                                                                                                                                                                                                                                                                                                                                                                                                                                                                                                                                                                                                                                                                                                                                                                                                                                 |                                                                                                                                                               |
|----------------------------------------------------------------------------------------------------------------------------------------------------------------------------------------------------------------------------------------------------------------------------------------------------------------------------------------------------------------------------------------------------------------------------------------------------------------------------------------------------------------------------------------------------------------------------------------------------------------------------------------------------------------------------------------------------------------------------------------------------------------------------------------------------|-----------------------------------------------------------------------------------------------------------------------------------------------------------------------------------------------------------------------------------------------------------------------------------------------------------------------------------------------------------------------------------------------------------------------------------------------------------------------------------------------------------------------------------------------------------------------------------------------------------------------------------------------------------------------------------------------------------------------------------------------------------------------------------------------------------------|-----------------------------------------------------------------------------------------------------------------------------------------------------------------------------------------------------------------------------------------------------------------------------------------------------------------------------------------------------------------------------------------------------------------------------------------------------------------------------------------------------------------------------------------------------------------------------------------------------------------------------------------------------------------------------------------------------------------------------------------------------------------------------------------------------------------------------------------------------------------------------------------------------------------|---------------------------------------------------------------------------------------------------------------------------------------------------------------|
| <p><b>8. Subgroup analysis based on age</b></p>                                                                                                                                                                                                                                                                                                                                                                                                                                                                                                                                                                                                                                                                                                                                                    | <p>Only patients <math>\geq 75</math> years were performed. There were 1,683 patients 75 years and over. The HFRS weakly correlated with the CFS (Spearman's rho=0.22 [95%CI: 0.18-0.27]; <math>p &lt; 0.0001</math>) and had a poor agreement (Kappa=0.05; 95%CI: 0.01-0.08; <math>p = 0.004</math>). Although the AUROC curves had moderate discrimination the scores were similar for both CFS and HFRS. The HFRS (5-unit increment; HR=1.05, 95%CI: 0.95-1.16), adjusted for ANZROD and sex, was <b>not independently associated</b> with 1-year survival for HFRS when compared with CFS (1-unit increment; HR=1.18, 95%CI: 1.10-1.27). Although the HFRS was independently predictive of only 90-day, 6-month and 1-year mortalities, the magnitude of prediction was weaker than the CFS prediction.</p> | <p>Categorized as &lt;65, 65-75, &gt;75 years. For patients &gt;75 years of age, the ICD-10mFI weakly correlated with the CFS for with had weak agreements. Cox proportion hazards regression, after adjusted for ANZROD and sex, demonstrated that while CFS was independently predictive of six-month survival, ICD-10-mFI was not. The AUROC predicted both short- and long-term (6-month and 12-month) mortalities, with the CFS consistently a better predictor than the ICD-10mFI. In the multivariable logistic regression, adjusted for ANZROD and sex, the CFS was independently predicted only 90-day, 6-month and 1-year mortalities, whereas the ICD-10mFI only predicted ICU mortality. Kaplan-Meier survival curves for the two frailty measures demonstrated greater survival separation between non-frail and frail patients for the CFS when compared to the ICD-10mFI for all age groups.</p> | <p>The HFRS independently predicted 90-day, 6-month and 1-year mortalities, whereas the ICD-10-mFI only predicted ICU mortality in the very old patients.</p> |
| <p>*Subramaniam A, Ueno R, Tiruvoipati R, Srikanth V, et al: Comparison of the predictive ability of clinical frailty scale and hospital frailty risk score to determine long-term survival in critically ill patients: a multicentre retrospective cohort study. <i>Crit Care</i> 2022; 26(1):121.<br/> **Subramaniam A, Ueno R, Tiruvoipati R, Darvall J, Srikanth V, Bailey M, Pilcher D, Bellomo R: Defining ICD-10 surrogate variables to estimate the modified frailty index: a Delphi-based approach. <i>BMC Geriatr</i> 2022.<br/> CFS – clinical frailty scale; ICD-10-mFI – ICD-10 code derived modified frailty index; HFRS – hospital frailty risk score; HR – hazard ratio; OR – odds ratio; AUROC – area under the receiver operating characteristic; ANZROD – ANZ Risk of death</p> |                                                                                                                                                                                                                                                                                                                                                                                                                                                                                                                                                                                                                                                                                                                                                                                                                 |                                                                                                                                                                                                                                                                                                                                                                                                                                                                                                                                                                                                                                                                                                                                                                                                                                                                                                                 |                                                                                                                                                               |

**Supplementary Figure 1:** Flow diagram describing the patients included in the study.

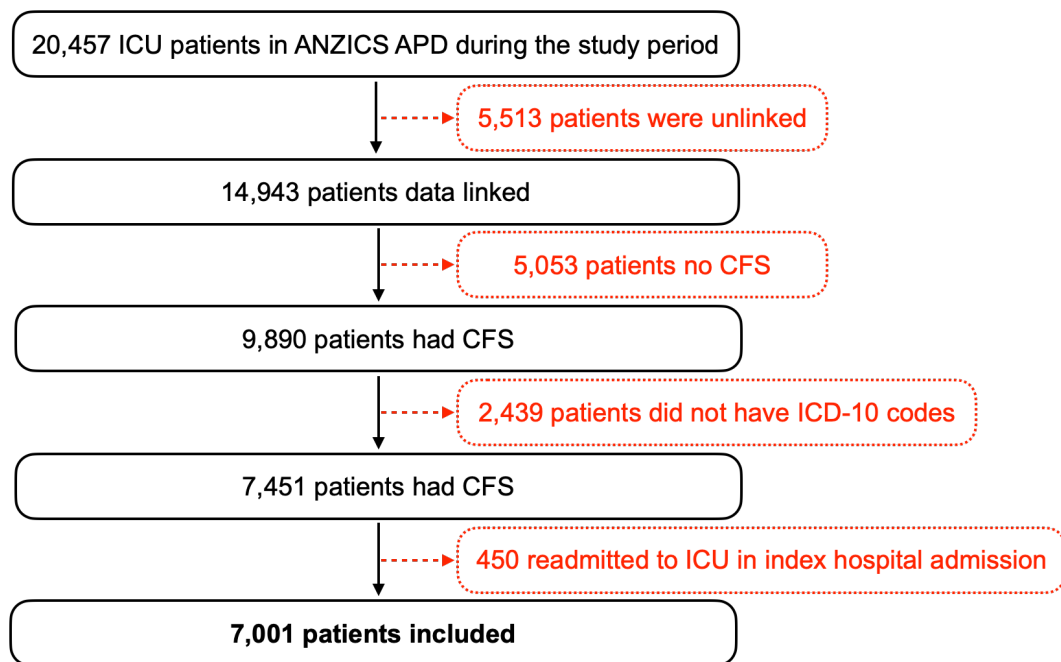

**Supplementary Figure 2:** Distributions of Clinical Frailty Scale (CFS) and ICD-10 modified Frailty Index (ICD-10mFI) scores.

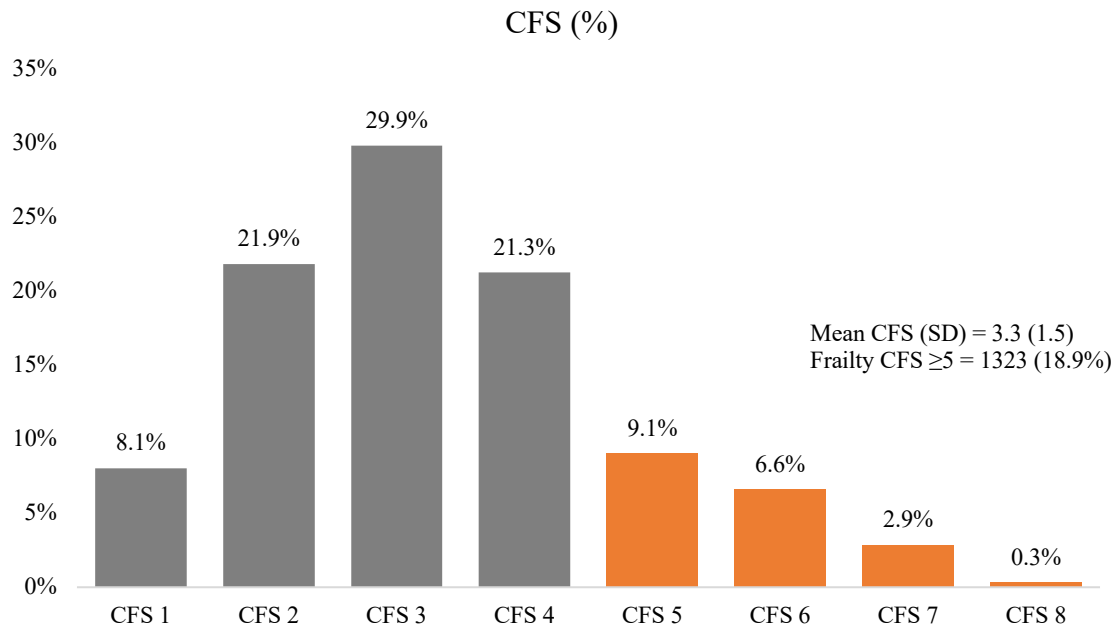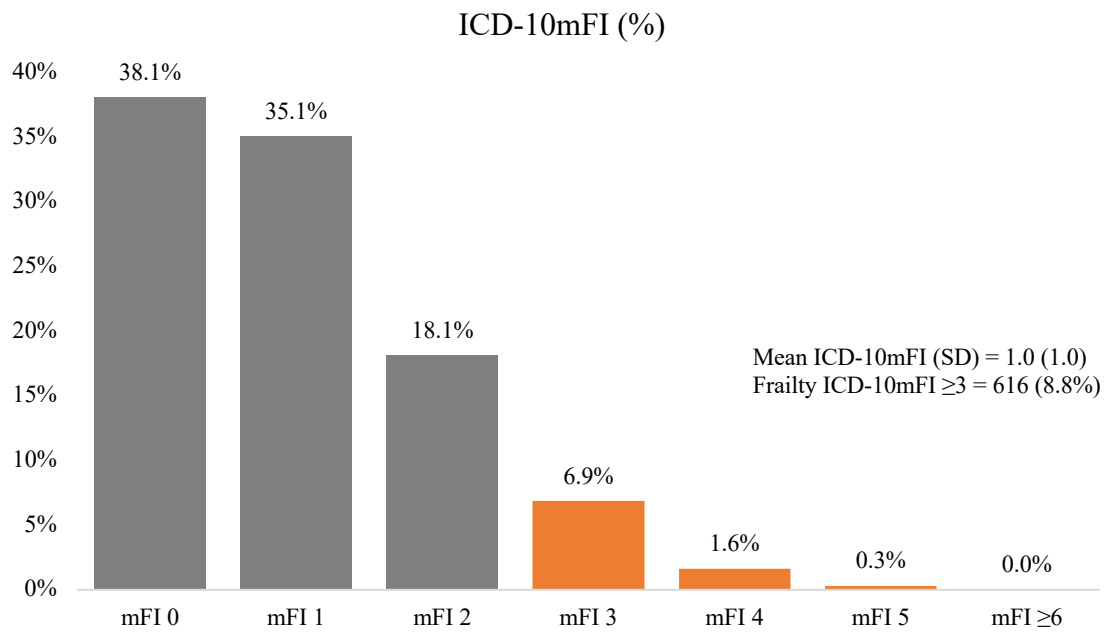

**Supplementary Figure 3:** Area under the receiver operator curve for short- and long-term mortalities. The CFS was significantly better than the ICD-10mFI. The right panels showed that neither provided any worthwhile improvement on top of ANZROD.

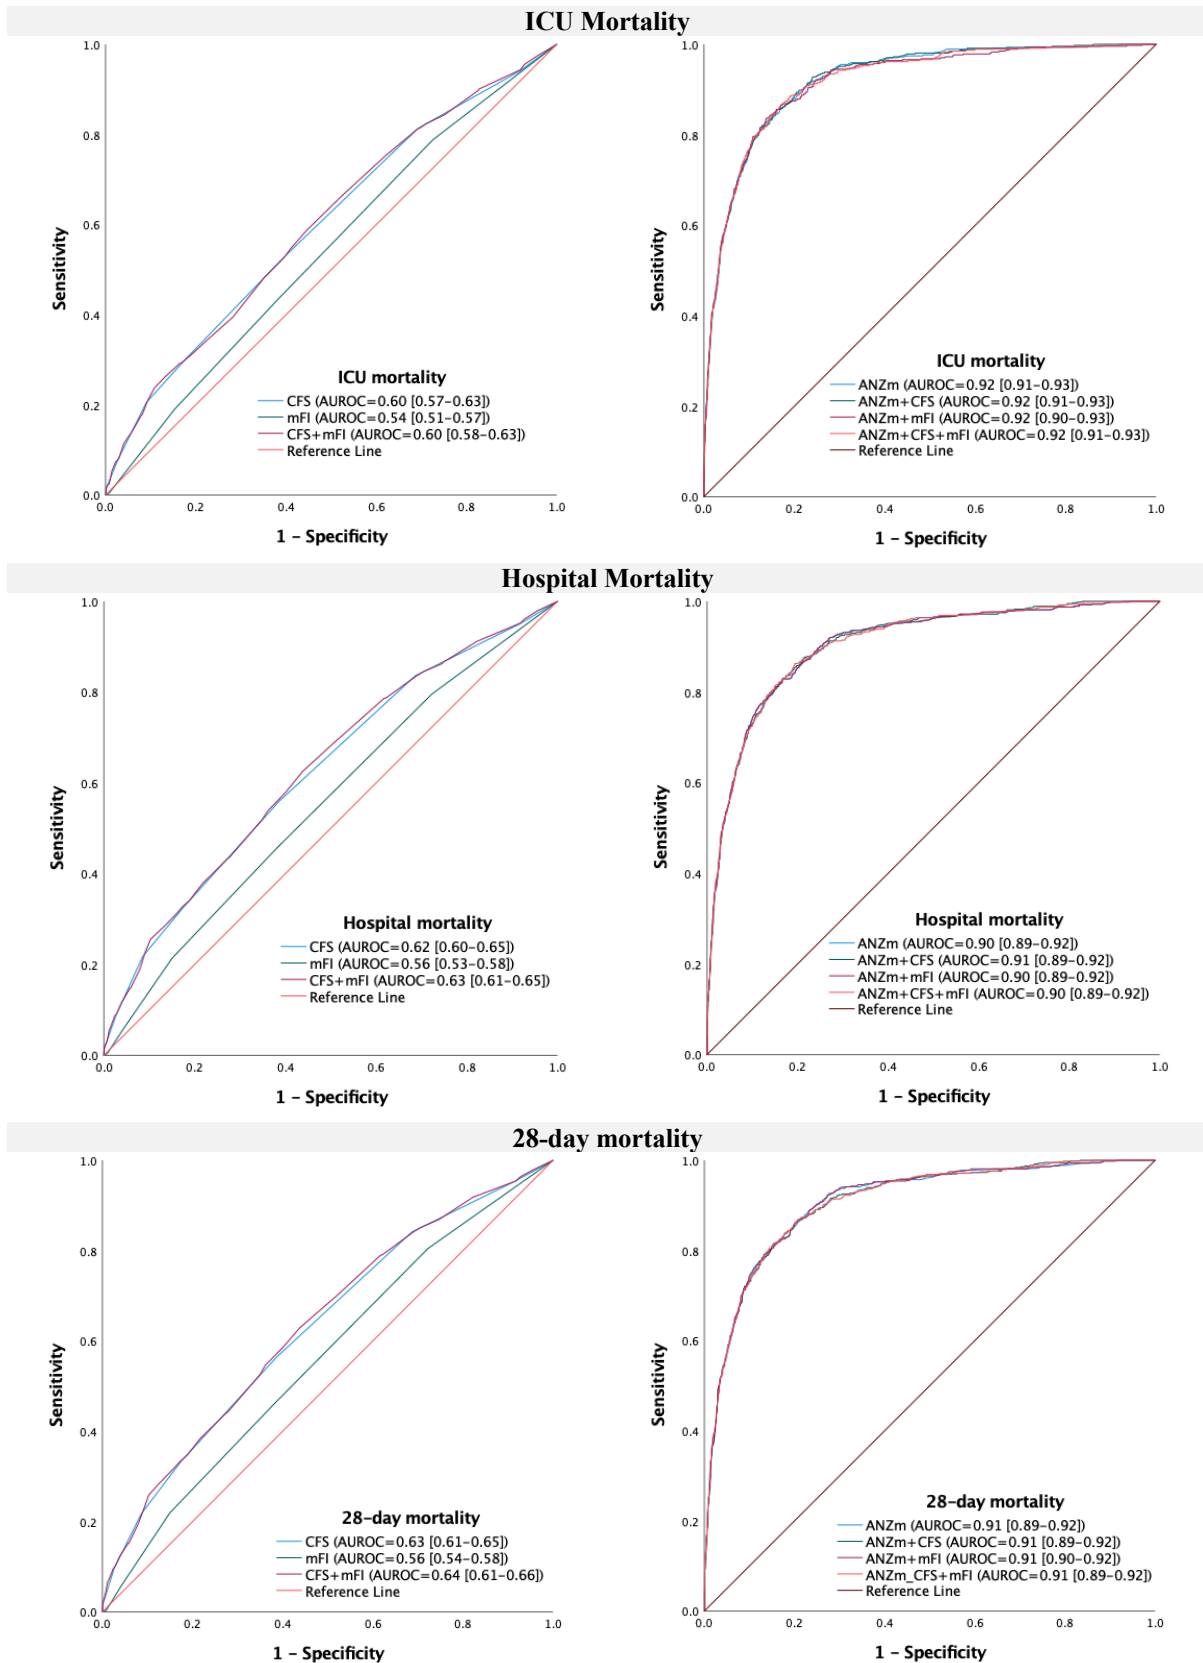

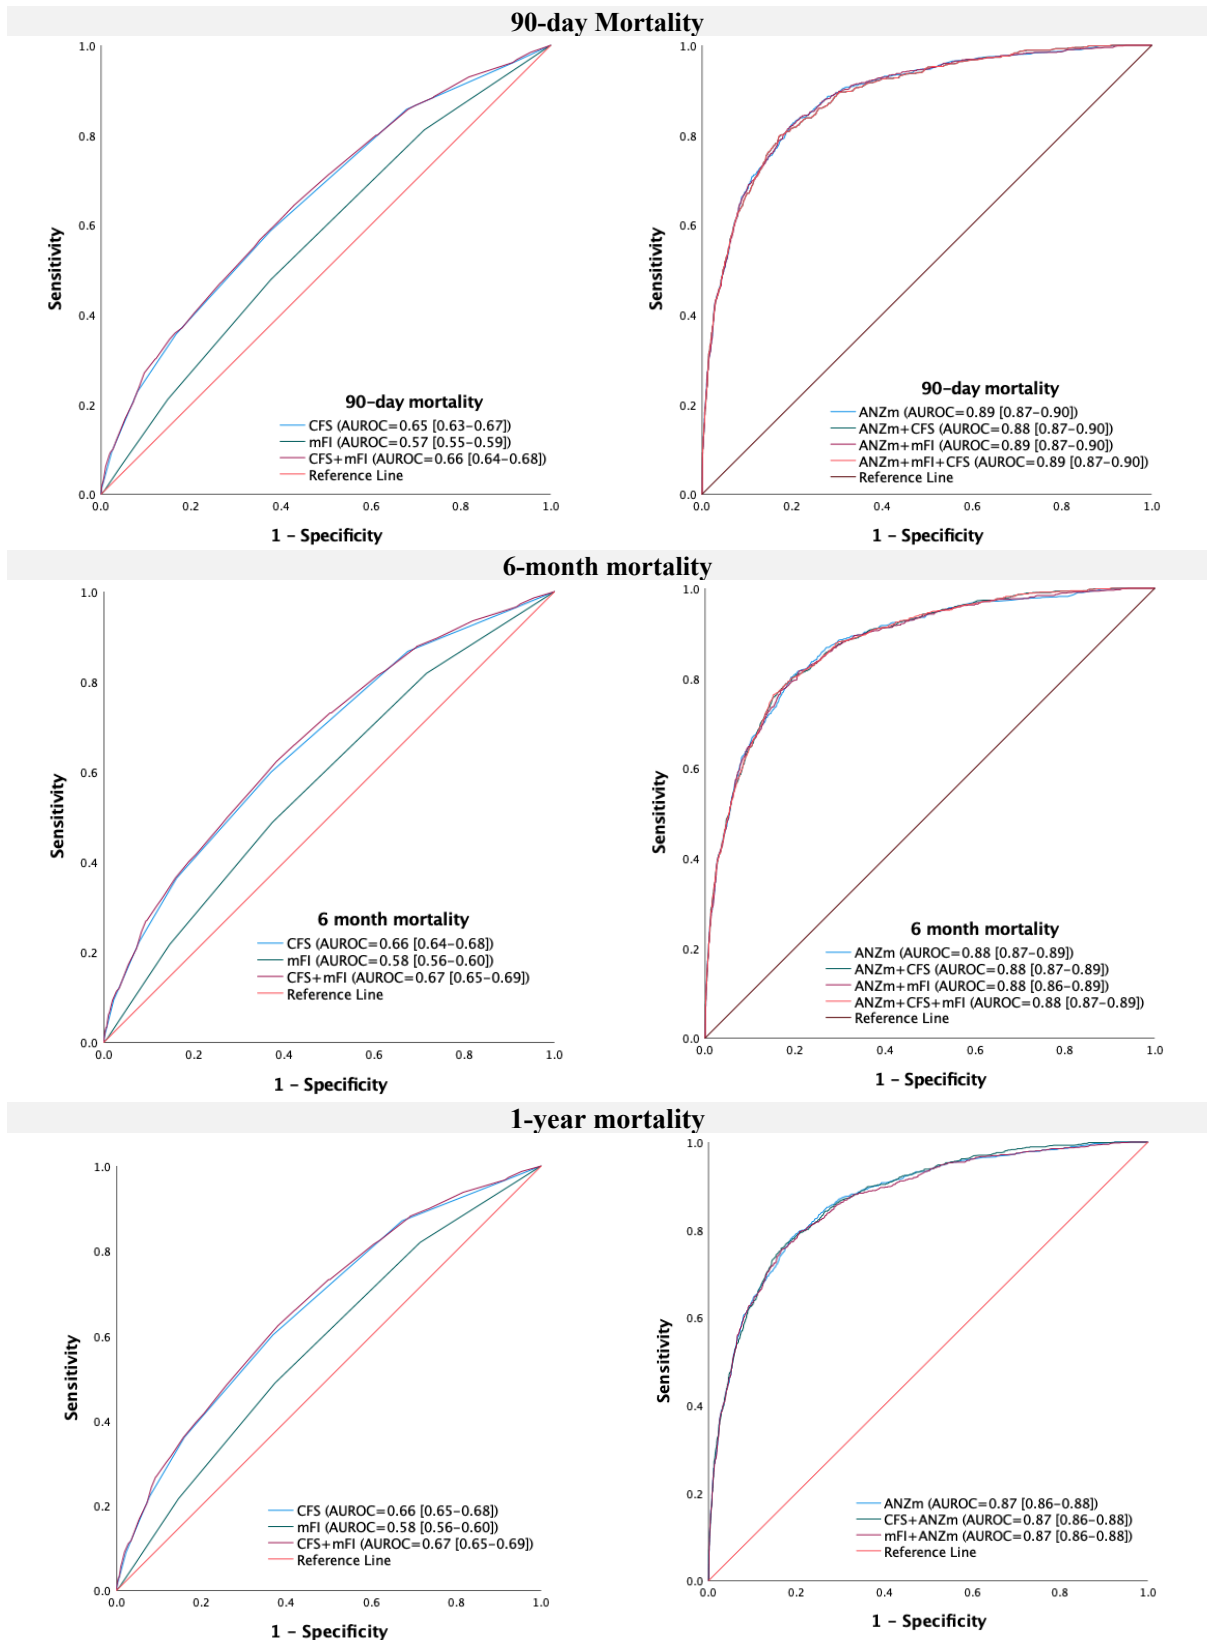

\*mFI – in figure legends represent ICD-10mFI.

AUROC - area under the receiver operating characteristic, ANZm - ANZROD+male, ANZROD - Australia New Zealand risk-of-death CFS – clinical frailty scale

**Supplementary Figure 4:** Kaplan Meier curves between frail and non-frail patients for CFS, ICD-10mFI with and without ICD-10 82.3 for Hypertension included for all patients.

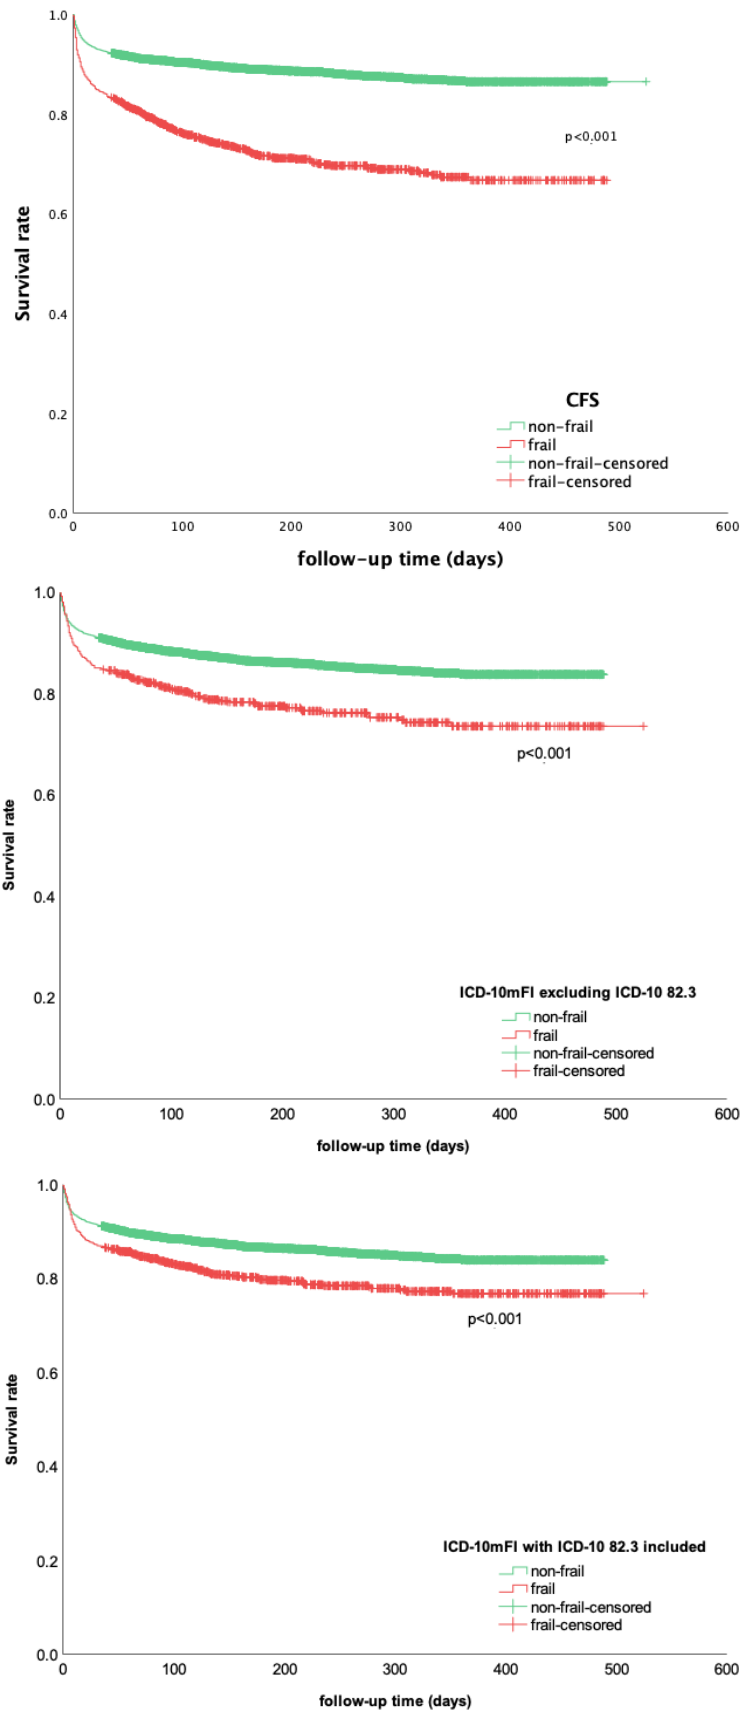



**Supplementary Figure 5:** Multivariable logistic regression, adjusted for ANZROD and sex, for short- and long-term mortality between CFS and ICD-10mFI treated as a continuous variable for those stratified based on age.

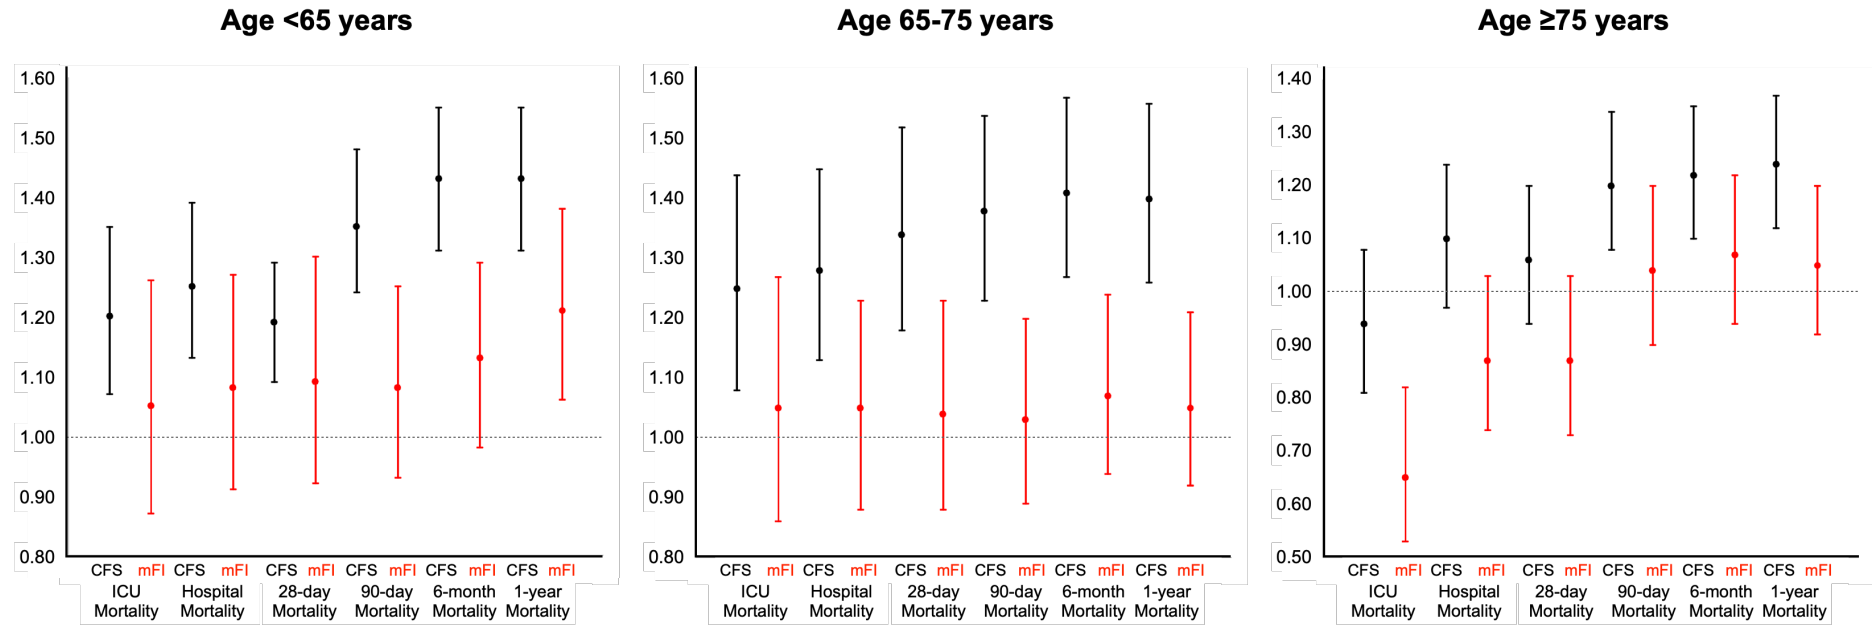

CFS - Clinical frailty scale; mFI - ICD-10 code derived modified frailty index

**Supplementary Figure 6:** Kaplan Meier curves between frail and non-frail patients (treated as a dichotomous variable) for CFS and ICD-10mFI for those stratified based on age.

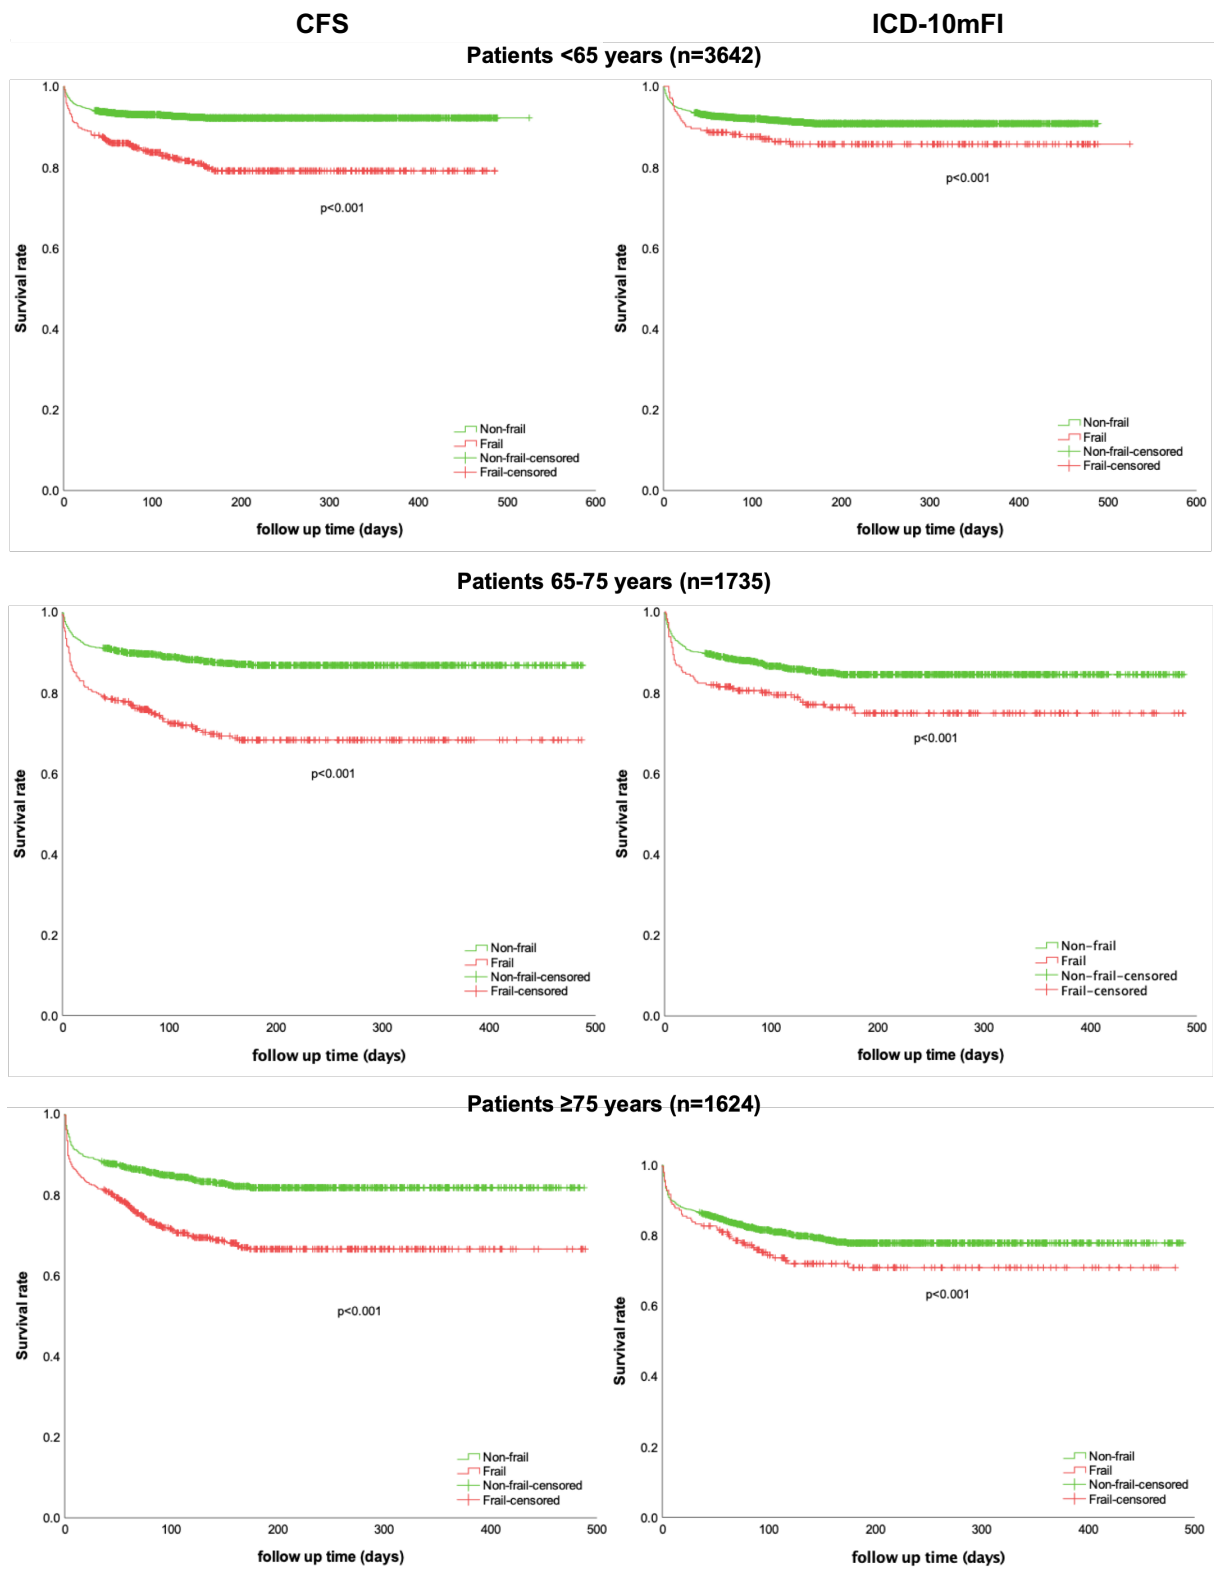

CFS - Clinical frailty scale; ICD-10mFI - ICD-10 code derived modified frailty index
